# Supplementary material
Source: PubMed Central journal article supplement (PMC11105627)
Supplement: 18_2018_2819_MOESM1_ESM.pdf [file 18_2018_2819_MOESM1_ESM.pdf]

# FAP43

1

```

Hs -MAOGRERDEGP-----HSAGGASLSVRWVQGFPKONVHFVNDNTICYPCGNYVIFINIETKKKTIVLQCS---NGI
Gg MAAAGGERNPGSPQLSAEALGGRCCSSPEETITLEVSVWVQGFNSKNFGFINNOTVCYPCGNYILFLDIKTKKTTALQCO---TGO
Xt -----MSLIRKITIRTAFAVRWVQGINKKKVTFINDHVTCYPCGNFIVFHDINTRKQSFLOCM---TGS
Dr -----MVAEMDVLRFNFVQVQGFNTNGTFRFVDKKTVCYTCGNFIVFLNVTETKERKTLOSP---GSG
Sr -----MDVLGNLEVRWVQGFNNGTFRFVDKKTTCYTCGNFIVFLNMETKSRKTLQSP---GSG
Ci -----MQAYGTLQVWAKGFKGDRLSHVDRDMVCFSCGNSIKFVNVVTGAEVVFOPP---GGA
Tb -----MATNARILGFNSPSALVAAGDFFLLGAGGIVIRRKEESSQWIPCEG---RYA
Tviv -----MSSNAVILGFNSRSSVAVAGDSVLLGAGAGVIVREGDESSQWIPGDG---RYH
Vc -----MAFQTKVAIGYNGSPVAWLGSSEVAWTCGNALVLSLNTKTQRVLKGT---GFG
Cr -----MSIQTRSAVGYSGGOVTWTGPDECAWTCGNNAVVLHTLGSKAQORVLKGT---GFG
Tt -----MSIYESFSYNGSPFQLVFNNTIGFIQGSTLVLDLWDLATDKKDYIHSQ---KNG
Pp -----MSIHSSYCYDGFQFQLAFKDTIAYISGGVLYFWDTONNKKDYIQSS---KNG
Pt -----MFSKKWFNLFSDCTAFTGDKWELLEQDTIGFLAGNTLCKWNLNNKSFVHSQ---RQG
Lb -----MLQSVARVLGCSAPAVFAVHGRRVFLPADNGVVVVEDSYEYLWAPFPI---GKYS
Ag -----MEQNIIRTKALWINPGAVEMACVVGNAAVAIAAGGHILFVNLKTTAKSYYSADSVHSGNG
Da -----MPHAETKWKFGDIRTIAFMGKETIAMASGLHIIFINLNTKEERVEKFDKERGEG
  
```

86

```

Hs VGVMATNIPCEVVAFSDRKLPPIIYVYSFPGLTRRRTKLK-----NILLDYTLLSFSYCG
Gg VGAFAVNPNRGVLAFSDRKLNPIIYICFPPELNKLTTELK-----HIQLDYTLFAFSFLG
Xt IGAFSVNTYSEVVAFSQDOKLHPSIYVYTFPGFVKRVELKE-----GAOLDYSLIAFSNAA
Dr IGAFTASGORRCIAFSDLGLKPSIFIYKYPELELTSSELK-----TTKLGYTALALCDTG
Sr IGAFTASGHRRCLAFLSDLKLNPSIFVYNPELEOVCKLKG-----TTKLGYTALALCDTG
Ci VCOVTSSSHRRMFVAEAEGLNPIITTYNFPSCEVVCALAE-----GALLGYSOLOFSFNG
Tb IGAFAVSPSAGLLCVTEVKLDVSLHVFRRFPERHHLQCIDN-----VATVDVQHMLFSSDG
Tviv IGVMAFCPEETSVLCLTEVRLNVSLLVFOLPDCDRLOKIDN-----VATVDVEDMLFSPDG
Vc ISCFVSKRYGLIAVAEKALKPNVYIYAISKLOLLAKLSPSELK-----EEHALPGGSSEKQOQANVVTLGITAMGFSGDG
Cr ISCFVAVNKRHGLLAIKAEKGLKPMVTVYSTKTLOPLAKLLPGDREEGAGGGADKPSGSGAVSGKQOSSGPVSVLVGVTCLAFSNDG
Tt FQSFVAHPKKGIIVVAEYSLNPKVFIYSYPOKLLRRTLEN-----VSELEIIQMDISFDG
Pp FQCFVCHHSKOLVFAADYGLKPVVOVFTYPEKKQIOAKV-----ISDLOIIQMDVSDA
Pt FQCFVHYRKNILVVAEYGLNPIVHVYDNENE---YDLVG-----VSPLEILOMEVSNCG
Lb IDKIAVS-AAGVLCIAEKRLHVALHFFDADSMQSLGVAEA-----EVFVSIADIIVFSADG
Ag VACIAGHKLFPIVAFARCTNPRILLVSYANTVLSILEG-----DOTECSYTALCFSES-
Da ACCLAGHPVVPMAFALSERRANPKVRVYTYPSVNKVSECIY-----GERNWTGFISSAFAGT
  
```

171

```

Hs TYLASYSLLPEFELALWNWESSIILCKKSQPG-MDQVNSFNPMNWRQLCLSSPSTVSVWTIERSNQEHCFRARSVKLPLEDGSF
Gg PYLASYSFFPDFVLSVWNWQENILLCSSESQPG-VAATSI SFNPMNWOQLCFVTESSVTIWCIEERNYDEHCLTONPVKLPDGRGSL
Xt PYLASFSSVDPDHVLTWNWQEGIPLCSESESO-TTYTTLTFNPMNWHQLCSSETSLIVWNIEICDNLYOLKAMPVKLPSEDGTI
Dr PYLVSASPMPDHIITLWNWESSGLPLCSHSLLD-EDISALVFNPMNWCQICAIKSKSLTIWNVERCDNYHLMKPSAVNLPDGDGSA
Sr PYLVCASSMPDHTISLWNWESSVLLCSHPLLG-EDVTALVFNPMNWCQIGAVNLRSLTIWNVERCDNYHLMKPSAVDLPAADGAV
Ci SFFAATSSIPDFSIFVWDWOTGKLCHEKLPGESPVTSLLFNPNLKNREISTISETHVSIWTLLECNEISTMKSKVNVLPPTDGTI
Tb EMALLTCIPTTCVTFYSAARGNRLVKCASTEL-----GGVFCKHLTFPLHRHDCIAVLEPHGVRVIACNMDSATFVPSITL
Tviv DFLAMLTCPMSPCVTFVDVHGMLTKIHTIAL-----ESKFWKSLAFPPQENSLAILESKSVMIATNVVSEFTTPIVCLKL
Vc ERLVICGDEPDCSVIVYSWRKGEVHGRSRLP-----HNQPAHOVSFHPLDPTILATTHSG-TVSVWYLEAMWDRTLFRYO
Cr ERLAVCGDEPDCSVIVYGRKAEVLGRCRMPAA---ASSASSTPASSVSFHPLDASVLATSGPGGACAVWFLPLWEKAVFRPL
Tt KLLLVVNGVPKFEIQVYDLETGQRLSGT-----NSSIPLRNKFIKAQFSPKDTTFCVLYEN-NLVLCIEIFPSFEVDONSQE
Pp NKLLVIVVVPNKEIITVFDLTSNWLSDKNVIRRIEAGEYSSVHLKSGFIKAQFSPONNNIFAVLYEN-VLELYEILPTYEFVNGROE
Pt RYLLLVILGVPKFEICLWDLKEKCR-----KGFQSLPLKLNFIKFTILG-ERILIRYAN-QLQLYQITPHYDNQIQOV
Lb KELFVLGTVPDITVTFIRRSTP-----NGSYSADRVPLOHSEEPKGLLAFGFEQSVVRFVIRWIRSGCIAGY
Ag ELLVALTGVDPDYSLEVYAWRSKELLCK-----KPSSIFCEVORLNCSPSAVFAVCOYAPRKPDCLKWEVH-
Da DYLLTLTSSPKFKAVVWLWRIG-----ECLNTVDITGVSDIYQTMCLSPSPPLITQLGRPSGRLKLYELN-
  
```

256

```

Hs FNETDVFVQPSLPKDLIYGPVLPPLSAIAGLVGKEAETFRPKDDLY---PLLHPTMHCWTPSTSDLYIGCEEHLLMINGDTLOVTV
Gg N-HEDLFFPYSCDEDPYHGPVMPVSAIAGLVGDKAETFVPRDIIK---PSLHPTAHCWTATSDIYLGCKEGYILAIIDTRKCSASI
Xt GVEEENFNSSAPNGVSYGPVMPKSAVAGLVGEEAEIFIPKEORK---HSVOPSFHCWNATSDLYVGCERKILITISAETQKVIV
Dr IECEPNQSHLLNGKLYLGPOMPTSAIAGLIGDQADNFVPLKLIK---PRLCPSAICWSISSDLYVGCCKEGFLLCNPETLHVSV
Sr IECEANLSCMLSRKLTHTLGPOMPSAIAAGLSDRADDFVPLKQIK---PKLCPSAICWSTSSDLYVGSKEGFLLCVDPDTLLVSV
Ci LSNGEDLASRSGTQROG-FNVHLPSTSTRAGLVGGNADKFEPPELRR---PRVIPSQCWSSRGEIYVCGVGGOLFVFDGASGNPAL
Tb -----SSKGHYFHSQVWTEGLYCGA---GRGOVLLDEL---TDMKNYINCETPHNVNTALLON--GTLFFIG-
Tviv -----DSNGEEFHSFAWGPVGVFCGA---DNGSVILFDELK---MEMOILLTIDTKCAIMALHRT--KAVLLVG-
Vc SLGPGALPPGHDVTVHAWSPHGLYVGT---SGGGLALLDLPSM---TPLVIKASAVASAAAASEPPSPGGTAGGGGAGGG-
Cr OLAAGALPAGAETVCHAWGPGGLYVGT---STGGLVLLDTATM---APLQHAAGGAAGEVAGGASGGASSPTPGASSG-
Tt VLQN--IRIDONNKISEKTFKNIWD---EQNNIYLADY---FVRYLNGTDLSEIMNKDCEYLVEFFVLTQKHLII
Pp ELDKK--IRINKKASYEAEGFSTFIWD---EQNRIYLADKFNIVYLDIVFDQELNQLKPKLTHE SFHOITHFVLTQKHLII
Pt QLELVT--SIDLSAPTIMVODYN--LIDDSKNQOENNIYLIQ---NVLIYLDGNTLFEIARHECHSEIKHLIPTQIHLIV
Lb -----AHGEDGKCFQKCFVSEASIESACVSGPSTMCYITKE---GSLHVYSHERTFQDVEGSLAPAAASMIWVDGTVFI
Ag -----GNIRISRLLIERTVHLELE---TAELPLCVTFLLIDGNLAVVTRAKVFI
Da -----TCSKIVSLTPASLAPSPESRSE---KITSSSWTYDGNLLSDDLGNVYLTPTDGKRRQO
  
```

341

|      |                                       |                                                                             |                                          |
|------|---------------------------------------|-----------------------------------------------------------------------------|------------------------------------------|
| Hs   | LN                                    | -----KIEEESPLEDRRFIS-----                                                   | -----PVTLVYQKEGVLASGIDG-----             |
| Gg   | IORKPLPEHMLKISDMLGYIRREAOKKKDKPKALQRT | -----VVFTMAFCDEGLYTAGIEG-----                                               |                                          |
| Xt   | LAQ                                   | -----KDQDADPLSGVTLLEGN-----                                                 | -----IKTMAFHKEGLYIAGKDG-----             |
| Dr   | LYK                                   | -----POTEVT--TGNSEMPMQEG-----                                               | -----SFQSLVLQDSKLFAGMES-----             |
| Sr   | LYK                                   | -----POTELNPTDDSKTSLQEG-----                                                | -----SFQSLVIQDCNVFAAGMEG-----            |
| Ci   | LLG                                   | -----GISDSLVLVGEIECG-----                                                   | -----MFHSISLNSSEGLVAGGDDG-----           |
| Tb   | -----                                 | -----TECGDVFTYNIDOKAQR-----                                                 | -----LLVRLGRSVVRLTLTPDNDVLVATST-----     |
| Tviv | -----                                 | -----TORGVIFSYDVKRELK-----                                                  | -----RMSVVRHAVERFLACDDESNVLVSST-----     |
| Vc   | -----                                 | -----SAAGAFAVAMTAAAAAGVAPGQPAVVLDAAAGPGAGVSALALNRDHLAVCGTDGDSVHVFSQAPV----- | -----                                    |
| Cr   | -----                                 | -----GAAGGSVVAVVPAVTS-----                                                  | -----GAAVTALTLNRDLVAVAGADGSVRVFSVPA----- |
| Tt   | IL                                    | -----ONGKFEWLYKYPANLN-----                                                  | -----EDEIKPFKLEKTY--LYDEEKLVNILYN-----   |
| Pp   | IH                                    | -----ENGLIEWLWFKYHPKFEN-----                                                | -----DEDQKPFKFDKRY--QYQDEKIINILYN-----   |
| Pt   | VY                                    | -----ANAKIEWLYKYITNNLE-----                                                 | -----DKVAVPFKVNKKYNLHDHIEVKKIMYN-----    |
| Lb   | FTR                                   | -----SGDLLSVNLCGTHHRR-----                                                  | -----SLGCLPSCASRLVVTSAE-----             |
| Ag   | LAS                                   | -----TGOISOTICNPEPLTTD-----                                                 | -----QEY--IPYVFYCKGGLF-----              |
| Da   | VLQ                                   | -----SEETTPHLAGPLVVAFR-----                                                 | -----GGVAVANTSPKILFYRKP-----             |

426

|      |             |                                                                 |                                   |                           |
|------|-------------|-----------------------------------------------------------------|-----------------------------------|---------------------------|
| Hs   | FVYSFIK     | -----DRSYMIEDFLEIERPVEHMTFS-----                                | -----PNYTVLLIQTDKGSVYIYTFGKE----- | -----PTLNKVLDACDG-----    |
| Gg   | IILYFYHIR   | -----DLOYEMKICADISEPISLTFSS-----                                | -----PDYTTLLIVTDGOTIYTYEPAHS----- | -----GEAVKLLTAFSS-----    |
| Xt   | VLRSTIK     | -----GSELKLEDCWSVOESIESISFS-----                                | -----PNYKMLSIAATCKGSVLYNHRNP----- | -----GETYKVFVDVYSG-----   |
| Dr   | VLRSIQIK    | -----GNKLEVVQWALEEASAMCFS-----                                  | -----PDGETLLLSNTGCVYRFLKPLK-----  | -----DKAVKVLVDLVC-----    |
| Sr   | IILRNIIQIK  | -----GNKLEVVQWALNEAASSCCP-----                                  | -----PDGETLLIVSNTGCVYRLKPLLN----- | -----DNIVKVLVDLVC-----    |
| Ci   | TLRLIOLD    | -----NMGVKITELHKGMOPIITCLSFAPPLYVDLVLSTSSGEIOHYSLVER-----       | -----                             | -----ECGPIITTRTG-----     |
| Tb   | DVTKISVD    | -----TAQSVFVRRRSASDTVKLLVLGG-----                               | -----LVVIVCLDGLSVTYDQDTNTAG-----  | -----HTPVRFPKVVDACV-----  |
| Tviv | DVMKLDIN    | -----LASSTTISSRNTGNIVKLVVIGS-----                               | -----LVVVCVSSDGCFMLYEHEINTAI----- | -----HIAVHFAEKAMDACV----- |
| Vc   | AEALGPPG    | -----FSHEVWLARGG--STGVPVSSADCGGPEHTALLGCPDGTIYCAPMGPHTGAG-----  | -----VTSRAGYTTATQIGDYPV-----      | -----                     |
| Cr   | AAAAITPEPLA | -----LSHEVWLGRAGPARGVAVASAECEGADHATLLGCPDGTMYRAPLAPKOGG-----    | -----                             | -----GPTHSTVIVDCHV-----   |
| Tt   | QTYSKLYAG   | -----SNOGSIIIFPVEGETFDIEEEEEQDDKENEHSDNEDESREIEIQTEKKG-----     | -----                             | -----PYPFSPIVFIRE-----    |
| Pp   | QDFTKMVAG   | -----TOEGSLILPEVAETLEGEEEENLDNEQE--GSDEEKSRIDIDLOTYG-----       | -----                             | -----PFHVGSVIFIKE-----    |
| Pt   | QOCTKLIWF   | -----IROCYSOYNPYEAQVDQEE-----                                   | -----DKVIDLTHEIEPVKLG-----        | -----PYQKGVITFIRE-----    |
| Lb   | LLLSTOTGL   | -----LAVAVPVVINGGAADSRVLVKGWTEASTLRCLSVNNGASAAWVLRDGSIALYK----- | -----                             | -----RDDVRVLTPCGV-----    |
| Ag   | VSAPDGOVNFY | -----KKQKGTWNOMWSTOSDASYSLLSYSTAEGGLGITTEGFIMRTVLDTDVR-----     | -----                             | -----NVEFOIVKDLDV-----    |
| Da   | PAERVKSG    | -----SPWKIWEIETSSPVLYLSRH--PQDSILLCSIKGEISEVSVGDDD-----         | -----                             | -----IPRLQIICQG-----      |

511

|      |                                                                              |                                                                   |                                          |
|------|------------------------------------------------------------------------------|-------------------------------------------------------------------|------------------------------------------|
| Hs   | KFOAIDFITPGTOYFMTLTYSGEICVWVLEDCACVSKIYLNLA                                  | -----TVLACCPSSL--SAAVGTEDGSVYFISVYDKE-----                        | -----                                    |
| Gg   | NLLAADFLSPGDKYCVSVTISGEVQVWVLENGICLSMLNLDIEA                                 | -----TAMACCPSSN--SAAVGTKGGQIYFIDITKVE-----                        | -----                                    |
| Xt   | DLLAADFLTFGNKYCLSTDISGHVOLWSVEDGRSVSSLSLNIAQ                                 | -----TAMACCPSSN--YAAVGSSTGHIYFIDAMKIE-----                        | -----                                    |
| Dr   | DFVTAPVYTDRSICLSVREAGVVQLWTLDDGLCMGSILOTHV                                   | -----TSMACCPAQ--YIVVGTATGDVLFVEMTTKQ-----                         | -----                                    |
| Sr   | DFVAVAPLYTDRSICLSVREAGVVQLWTLDDGLCMGSILOTHV                                  | -----TSVACCPAQ--YVVVGTASGDVLFVEMTTKQ-----                         | -----                                    |
| Ci   | DFVGAGFTC--AGKLAVTCREDEGLOIWSCEDGSLVASFSLCTR                                 | -----CSLSCCPSSP--VVAIGTWTGHVCYIDTSSLLSEEI-----                    | -----                                    |
| Tb   | VGSVAVVVYDSG                                                                 | -----FVRSFTVENTVSVVS--QMKVSD-----                                 | -----CPLTACTSDGVSVLAVCDKNVVFIEVADG-----  |
| Tviv | VNSVLVVAYDSG                                                                 | -----WVRCFTLNSDATVMTSOTRVSE-----                                  | -----SPLHMCLSDGGSVLAVCDKSVIHYLSVKDG----- |
| Vc   | GRLAGIVPHPGGGAFLTAGADGSVRLWAAEDGRLLARKALSSAQ                                 | -----CALAAAAPGAGLAAVGSETGVVRVVLVLPAPTSGSDAVSG-----                | -----                                    |
| Cr   | GRLAGIVPHPGGGAFLTTGSDGSVVRWSTIDGALLGRKALSSAQ                                 | -----TALAAAAPGASLAAVGSETGVVRVVLVLPAPTSGSDAVSG-----                | -----                                    |
| Tt   | LENONVVITVTONS                                                               | -----YIYFWDIEKKIQVSTFKLNCTI--VCGDIHPNSK--TLILGSSGVIRILDISNLN----- | -----                                    |
| Pp   | LKKMNCVLTISSEG                                                               | -----RFLFLWNIQOQLVFSHFKAOM--SSACLDNSE--SILLIGSOOGVIRILDVSDFO----- | -----                                    |
| Pt   | YKQHNVIIVCGSDQG                                                              | -----VLFEMDVISKQPLSSFNIEGKI--ISGELIEN--LIIGTSAGVLRFYNVADIR-----   | -----                                    |
| Lb   | RRAAVHACILNSSEIVILFEDGTLRCFDCVGEREVWSHQCLEWA                                 | -----PTFVEADGSG--TVACCGRDALRFLRCMDDG-----                         | -----                                    |
| Ag   | GKFFNCLNDAQOOLVGIKPAAGTVKLLQLETGAAGDTITVGR                                   | -----VTSIAHHPMPFFVVGSDTGYLHLVAVDQKQ-----                          | -----                                    |
| Da   | SGHLFLVSVHPGRFIATVDSFDGFNLFESLTGKLTGRMWLGEYGRALSVLSHPVLPPLAISTDTGRCLILNVAEAS | -----                                                             | -----                                    |

596

|      |                                                                                                 |       |
|------|-------------------------------------------------------------------------------------------------|-------|
| Hs   | -----SPQVVHKAFLSESSVQHVVDQGLFLLVGTAEK--KVFIINANS--SSSFQIIGFTEVAKDILQISTVSLLETDIVEVM-----        | ----- |
| Gg   | -----APRVVHRIFLSKFPVLSLHYDQSGQFLIRAMEG--YIFILDARP--SKLFOVLGYVVLAGEVLSLSVVSDFKNNLVEVI-----       | ----- |
| Xt   | -----ALRVVORMRLYCVPOHIFDPRGNFLLTGAADR--HIFILDARP--SHSFEVLGYIVVCGEILTLSSLSSEDSOQTKAM-----        | ----- |
| Dr   | -----KPRLVHRVHLYHVPVDHLVFDQGNCLITGASDS--RVFVLDARP--SKGFDIIGWIEAPGAVNLSTQYHQESKQIKVL-----        | ----- |
| Sr   | -----KPRLVHRVHLYHVPVDHLVFDQGNCLITGASDS--RMFVLDARP--SKGFDIIGWIEAPGAVNLSTQYTESKQVKVL-----         | ----- |
| Ci   | -----NLROVGSTRIHHSPTYLKYNAGGDFLLTASEDEPHIFIIDAKP--SSGFQICIGYVDCDGTIKDISIHN--SSTSTVL-----        | ----- |
| Tb   | -----LLETAASSDIFACAVTNLRWAVNGGRSVLAACNNGEVHNLCTFG--KCDASAGVTVDMTWRDLDFVNDLFLPLYG-----           | ----- |
| Tviv | -----VLQLOTTSEAIASTITNLCWSANNEQSLAACSNGEYLIKYE--SDDLGAAPAVIDVIWRLDFVTELLPLFA-----               | ----- |
| Vc   | -----GTOPSOQLRVMYRRRLHTSAIDALAFSPNND--LLLSAGRDGAVWLLALDA--RTGSCRALGFVTLPPGERVMAVTPRAG-----      | ----- |
| Cr   | -----APLP--ALRVLFRORLHSAPVDLVFSPAND--LLLSAGRDGIAWLCSVDA--RGGVRVRLGCLSLPPGERVLSATWPRSDGSGAA----- | ----- |
| Tt   | -----GVHLLKQIKVLKDKPVSNLHFNPDGSMFVSSSTESKKIYLINS--TKYNIIGYIALPAKVNTACWNTSQKLV-----              | ----- |
| Pp   | -----KIOMVKKIRLRFKNKATIEFLFSKDOSLILAGSSDSKKAFFLSTONSRRKKPYRVVGYSKLPYKINYLWNSSNVHK-----          | ----- |
| Pt   | -----QPVLFKMIKLYIDKAISSISIDNN--LAVCSSDPTVFFFN--ENLIGFVDLPFCQAITYG-----                          | ----- |
| Lb   | -----VEDRGVVRTLLASICLVRWVPEMETCLLVVCONGDAFLVEPKD--GDAETHTAEAFVRSWRDLDFPITDALVC-----             | ----- |
| Ag   | -----VKLFGRLYLSRHPVIVSVFAIADSRFFGAVDATGOIAILELSDG--WQMNVLQVFGELGKAKHLFMWCS-----                 | ----- |
| Da   | -----DPLVHNCFHILIREPLDAAKFSQSGRVLGVCSTRAGRIFIVRGFEG--NIHVWGLLEISEKIADYLIYED-----                | ----- |

681

```

Hs  VLSS-----LPEAGRSRLEMFLLPTLLPOVS--TTFADERGRLLKDEIIH-----K
Gg  VLLS-----VAENOOTRLEIFCLSSALMEDI--DKYVNDQGMNLVNSAIK-----K
Xt  ALICPV-----NEGKEEKGGTRLEMFSLPLQLMLSSP--SEYIDEKGMFKDAMVO-----K
Dr  VLCN-----KSEKEISFGNVLLLLTLFAOQLTES--TSCMDAHCGLRKEVFD-----S
Sr  VLCS-----KTEREINEGNVLLLLTLFVQQLTDS--SGCVDVYGCLCKDALH-----S
Ci  AVMSQ-----SNDNGDYDSNNLIMFSLTSELLSNTD--GHFVSLRNNFKDTSVK-----LTR
Tb  -----DGDVINIFVHSVVDKDTKMYALERQRVKESKPLRPYF-----LM
Tviv -----DDDVINILVHSVVDKDTKLYVLERGRDKEGKPLRPLF-----LM
Vc  -----SDVLDGESAFISLAGGGIMSLTASAEELTSGNWRNPNPDLQLV-----RPTAVAAHGSRSLSGSDNGDSGPGSGAPEPVVV
Cr  SGHAQAGPVSTTSAEGDEPSCLLSLAGGGMLCLTASAEELHSGNWRNPNYPDMVLL-----VTI
Tt  -----LPTHKNVLFVLLNYFLISLIVPDATYONKDLKIDNDVCP-----V
Pp  -----PNQKTSAFALVNFFLIAIIPPNDDEEYK--ELNLGEEVCP-----L
Pt  -----KGOLFICICSFLLLSIPOPKOSSSLKLEVOI-----
Lb  YVT-----PDVNLNLFVHSADHDSKVYMLDRQREGDGKVSRLPF-----LI
Ag  -----SQEVLVVOPLETEDSISFSSIEFIVKQHSLEETTRT-----QL
Da  -----ETVTLTLVQSNKHVAVGKYIAVYKTTGPDYFELRD-----VV

```

766

```

Hs  YLYELEHALSSAVLGFOSNO--IYGFCSQVPIYCSYLLPEEEHTG-----IYILKPKYKKVQSRQYGPGLLYLSSHGLWLITIAK
Gg  EQYDLEYPLSSAVR--LKDDI--VYGYCTCAPFICKYHLSKQSILED-----PPVFLSEKMIPSNQFGAGFICLSPNSRWLASAAK
Xt  ISYDVOOPLFSAVLGYNVSS--VFGFGSYAPMLLKVIHKEISGDP-----LTALVTEKVVRGSHLGGPVLCSPHLKWI SVSGR
Dr  CVLELPLNSLCSCVL--AVNK--IFGYCOQRKVLQRFSSIPENGENPNN-----VVQLIPEKETGGHLLSPAFLQLSPHHTWLASVGR
Sr  CLYEIPHALCSCVL--AINK--IFGYCOQRKVLQSFRIPESGVKPSNAQE-----AVHLILEKEAGGHLQSPAFLQLSPHQS WLATVGR
Ci  HSLSVSVDSAIVTTIGDNIE--IAALSSESKNLLQFKLPHTTQG-----PTPIHPVSEHYGHOLS GGSIIILSPHGKWVASFAP
Tb  RDHECGGNVLRQLGGDSIISAGGDGRVVVRDISHYLMKLPVPPTKEK-----KHPLKEFLLRPFGRGGITCLSVWNAAGGFVCGGN
Tviv RDHESVGTIVLQRLGDEKVISAGVDGRVVVRNISHYLAKLTPIPPSKEK-----RNPICDYALRPF GKGIRTLCVWNTDGGFICGGN
Vc  RLLRLEVVPVLA MTTAPHDRGTGELYGLGADKQLHKVALPAEAAA WAGLR-----ARPFRSSVHVPAHARAGGGITMAPGGHVLVSGGA
Cr  KLLRLEVAMLA VAAVPGDRYGDAYGLGADKQLHKLVLPAEAAA WAGLR-----ARPLRSAQHVP AHARAGGGVAVAPGGHLLASGAA
Tt  YARKIDPDMNHIAVNOVTGDILMTGKDKIVKRYKQPEELYAKMDTRIK-----VGGAP--IEEQDGHPLPTNAMIISDQFNLLITGGQ
Pp  FGRKTDNNLNLV VHPRTGDVITTGKDKMLKRYOOPDKLYOTL DLKLLK-----AGEDP--LDEVDGHSLOTNIMRIHSQNNOLISGAO
Pt  MGRKIDPDQTL LLIIVTPOQ--EVITTGKDKIFKRYKPEELLSKMDL KMR-----VANQPPVDEQDGHQLPATCLA IKD--FLYSSAK
Lb  HDHSSGGSC LLRLNDSTVISCGRDGSIAARDLTPYQTQMTPIPPSREK-----RKPLVWHAVRSSFFGGGITTVATTDITGAEVICGGN
Ag  RLPKDYCHIIPK CAGTNLNFYAYEIRTNVIDLLEITRTDADIDVLLR-----TIKTPLAVSHLELCVDDRYLYVWSM
Da  KLPRVYASLHCGSDFGEIIASPF LSKQLHLIKS EDNFDFILTEALS-----SSHRLRDVKINADTRYVVTFGY

```

851

```

Hs  CGILCIRDVYTTLET-----FAWCRSHSHQGHGHIQSMRISMDGONILVNGRDDGTLVYL--KWKRFGGH LASEILDYYOKLLI
Gg  DGVLFIYDTSTMEI-----LAQNYCHSYEGGGRSMVFLDGLFILVNGENDGTLVCL--KWKKIKEIEVKEAD FHWHSLLT
Xt  DGIVYVKDIKNMET-----VAQVOCHSYHTGGINSLSFSLDGOSIITGTDFD GALVCL--OWKSTGSSRLGA AVEYGKAFTL
Dr  DGLLRICEIEMDR-----YVQLQCHSCWQGGVGSVCFPTDPSQTIITSGLRDGLSVC--RLKLSGVG KANAATQYSQSVAD
Sr  DGLLRICEIEMDR-----YVQLQCHSCWQGGVGSVCFPTDPSQTLITSGLRDGLSVC SRLRLKLSGAGKTNAATQYAQSVAD
Ci  DGDVIVRDVSNWDS-----ITRFOPHSYIHGGVKTTLTFSPDASHFISVGYSDOACMCYOWNFTSKGQSAGNNAVEYARVLMN
Tb  DSVVHLVP-----VGKSPIHYSWSEPFWHQRAISTSPSRASSP--SDAETLSAER-----
Tviv DIVIHIIP-----NGSANIEYSWTEPVVWTRSFSAASGCSSP--LKSEHNILGQ-----
Vc  DGVIALRNLNLAALGDSSAGGGIGGSVLHDTVAGGVSVSFDATGRYFASAG--ADGAIIVFEVGP AAGAAHLLVTPPWPAVPPFAG
Cr  DGTVALRNMSLITLAAQQGGDAG--AGLHDLITAGGVTVSFDATGRYLASAG--ADGALFYEL-----
Tt  DGSYILRNLEKLS E-----FOQIKSHNWKINGVSTLDFSKYKLYL YSGG--YDGSFFAWSLD--KVSFQNIORN--YEILRED
Pp  DGTIFIRDLNLM D-----YHOIKGHNLKRYGVSYLEFSQKYPLCYSGGNGDGSFFVWK FONEIMFDODNIELPPQKVLEEN
Pt  DGTIMFRSYQQLNOD-----VRLLRGHNLKSGGVSTIYVSQKFKMIYSGG--FEGDLFWWTG EK--IRGDSDA AQLMKSNNAP
Lb  DGVIQCVTILKAEGA-----HATWQEPQWTHAEARLGI VGDKITTVQAG-----
Ag  DGKIALYELLTVLCH-----SGMLTVLKLLOPIPOS PNTMSNTSKSLPCEAENS SLLDETVIDA AVPWIEQAERERWEEKGK--
Da  DGLVVIRNRSNLSQL-----IAVLTTHHRQEGGVKHAVPCPNSILVTLGKNGNLVASKISQLESAE VGDHVT SFADAKVVLS

```

936

```

Hs  SLSSAMDKENHYLSTTPKVSVDLGS--DSE-----HTKQK-----ASTDLSODELVLTD-----VKKEIPWIQQKSQE-----
Gg  IILNKSIDENAVLRILMAEWOLES E--TSESLPEEKSKKSPLEPSSAAVTE DGSFTSLHSDSASEMTWLGQKTEK-----
Xt  SLOAMKEENQMLSRMP EWTADTSS--MAVESKEKEYRN-----LSVDVTEODTFPN-----TSADVTWIYR KLEEVQRNLCIYSR
Dr  SFESVVSSENTIVLTKM TDRD--SFHTGEVSLK GK--MSHEAEQEENYFVS-----PTS YTWLDGK LDA
Sr  SFESVVSSENTILSKMTDWD POTOSLITRCSSFLTREGK-----TSHEAEQEENYFVS-----PASSTWLDGK LDA
Ci  RLRSVMDVEGDVLAAMEEW--SPSTKIATPDQEEQDSD--VTRPKSGARSEVTMT P--TPTPQSDATWLDAR SLL
Tb  -----
Tviv -----
Vc  SVTAASRVEADAIDDA SELTEVELVRRQGALETGGING-----
Cr  -----
Tt  VNIQDLPDEKVMHYQK VLEEELIKSKKEVN-----
Pp  OMIMDVQDNEVIHYOQ ELQEEFIRSOKEIR-----
Pt  MEIQDMPDQEVRY YQVLESEFLEQQAPIR-----
Lb  -----
Ag  -----
Da  NSTGVELDGDGDSTWIELKEIRKLERERN-----

```

1021  
Hs -----AIKKEVNLFSKRRKEIKOGIKSLSKTILNMMEENDK-----LENIAKLDQOQFGLDLE  
Gg -----DIREETERFANOKEKLOMGIKKLRKTIQKMMHENEQ-----VPDIEKLGQOQFENLDME  
Xt **KCCVNSIFWKRNDNGYVLNTNVAVWVKLHLFAKKKETEKYAAEKEIKTG**IKKLRKTIQAMMRENE-----LPDIEKLDQOQFENLDTE  
Dr -----VLOEEAQOYAE**TKKNLRRNIKVLRDTIKAMMEENES**-----LADIEKLEQOQFENLDVE  
Sr -----VLOEETQOYAET**TKKNLRRNIKVLRDTIKAMMOENEN**-----LSDMEKLGHQEFNLDVE  
Ci -----AVKEENAKYDEVKRD**LRKNIKELRKTILGMMENNNNS**-----LPELEOLRHDEYNLDTD  
Tb -----**SRCRIISALADLRMEVEKLLQERTP**-----TVRAEDFLLP-----E  
Tviv -----**SKSYILSTLSELREDVGKLLVERTA**-----AVRAEDFLLP-----E  
Vc -----**ESKRAAVVSKLMSLRSRIGELLEANOQ**-----VPELERLERSSELIVDVG  
Cr -----**SKRAAVANLATLRRIADLLAANA**-----APELERLTRNDMIVDVG  
Tt -----**EOSKKVIEEGLKKIQNKLLLELDHNKNEAEELEKLERDDFVIDID**  
Pp -----**EKQKQEIQSNLGKIKSELEVLLNNNEN**-----AAEELKLRDDFVIDIE  
Pt -----**EOKKROTCDLLKQIOTKLNALLOENAE**-----SDELEKLORDEFVIDLY  
Lb -----**DAAPEREALLAVSRVRELWVKVMSDKDT**-----EVPLEAFLLP-----E  
Ag -----**IYEPEHEAIFAEFGEIKHOLKELLNHNER**-----APVEERFPLOVFNLNAE  
Da -----**EMAIERASILSDFEKLDRDLKALIDDNEK**-----ASEAAKLPLENFDLDKE

1106  
Hs **ELERLHDESOEFVAKMIKDVEMHNLA**KS**SYLAELIKEECWNSMAVKG**RALKCFHIP-----CVVENFPMKARTVEELKELERVLOOKKIE  
Gg **EQERAEAEAEQ**EVARVREKIEME**ILLANCYLQDVIKHECWD**SMCVKGRAVKCFRIA-----CEVKNYPLKKRDEEELRTLEKVLRLRNIE  
Xt **EQERLYLESEKEVARVROEIE**LENLSKOYLREVIK**OCWDSMAVKG**RSVMAFHTG-----YEVMMNPKERTPKELEDFARVLNLKKIE  
Dr **EQORLQLEGDQ**EVNRVRKEIEMEN**LAKSYOREVLKRECWD**SMQVKGKAIKAFHSE-----NEVKNYPMKERTAKELEELRMVENMQIE  
Sr **EQORMOLEGKQ**EVTRVRKEIEMEN**LAKCYOREILKKECWD**SMQVKGKAIKAFHSE-----NEVKNYPMKERTAKELEELQRIETMRQIE  
Ci **EOSKMOEODORVOEIREEIEFENLA**ORYLAYLITK**OCWDDMVTK**-----VVLSPTTOPPVFPVKKMOSETGTK-----  
Tb **QROAFNEECEMEIHKAREDDY**SLVHNEFVQHTIK**TECWDVMEVORSKIVSMTDP**ETEVHNFHLRKP**CAQR**AKIQKKIKLMRAIQ  
Tviv **ORDNFNADCVTAIQ**EAKEDDYRMVHNEFVQ**HAIRRD**CWNTMEV**POSKIVSLTNLSE**VFNFLR**KADPTATN**ILRKIQFLRKLO  
Vc **LVERLKHDT**EARVA**AAVRRN**LRTELLAERLR**RMVWDHLAVK**GAVVSGLRSS**L**-----VVNNFPLTOPG**HERVLR**OVTLRRRVE  
Cr **LVEELORETENRVA**AVQA**AVK**EHLRTELLAERVR**RMVWDSMAVKG**AVISGLR-----APPGOHERVLKQV**TMLRR**VE  
Tt **TKNKILD**SGKOORKQIKETAKREN**LKOEI**IHSKIK**KEKTWDM**AVOLKGINGL**KSK**-----YLVVNYHIRKRTADEERKLKIVKDLRRIE  
Pp **TRDOILK**QGEIECEKIRE**NAOKENYKOE**ILHNRLLEKT**TWNTMK**THLKAINGL**DTN**-----IIVVNYHIRORSEK**ELOOLK**WIONLRKIE  
Pt **ARDAILEDG**KK**QOQ**ALRDLV**KKENYKOE**ILYOLIKERT**TWQIE**IP**LKGVN**GLIQH-----IIVTNYHIRVROSE**ETRKL**KLIRELRKQIE  
Lb **ORDQFAA**ECDS**AV**FD**MREGHY**YHAILNEYL**QDTLRR**CC**CEAM**EVTRMKVVS**SMKTS**ELEVHNFH**IHRRT**RAEAS**LSRK**ALFLR**LO**  
Ag **ATEKL**TOEANHT**KDEE**KKR**LOOF**IESOKDINE**KLIENC**WMIMTK**PKPK**IR**PMFKK**-----AFV**ENYA**IV**PANEYR**-----OHLEKVRVYRETE  
Da **GRARAIEN**NR**EEQ**KNLVR**KL**E**KAS**REAEIS**EFLR**KL**CWDS**MOV**PACAL**ISLDGR-----VRVDNYAL**PRISD**Q**EEERR**AWAKFYVDLS

1191  
Hs **AECLKLRKEIVEAOSGVKLIKORHEE**-----  
Gg **AADLKVQEKVLETKSKTVLFKEEN**-----  
Xt **AVDLKVRKEIVETOPKIKADDEEEVE**-----  
Dr **QEDSLOQEGVLDTLFGDKKEE**-----  
Sr **QENSLOQEMILNTISGDKEQEEAE**-----  
Ci -----  
Tb **IKTEECFTLSSLVKRAK**EGNLCTEQ**QACGP**-----  
Tviv **LKVG**DHFT**FASVK**FGN**KEGEV**GEIP**AAPQD**-----  
Vc **LLEHOALGVVPYN**-----  
Cr **LAEQAALGVIPYG**-----  
Tt **IREQ**KARKEAKD**OV**LKEI**IP**V**ED**L**IKK**PEEYI**INAG**PGK**QKLV**LIDY**EKKEE**T**KDD**-----KNKGAGTT**TOTGPAG**-----OT  
Pp **LKEOKLR**KEN**QEQ**-----E**IVD**IFEFID**EP**NY**IVNG**VAEK**POM**V**LIDY**E**AO**EEAK**QO**EAL**QAQK**Q**KINTI**Q**QPAK**G**KGMGN**Q**OOA**  
Pt **IREL**KIRK**Q**-----**QAIKE**AW**SIEE**H**IQDP**-----**KYI**IN**SK**PGA**QTM**V**LNDY**E**KKEE**V**APT**-----**KVA**  
Lb **KKSAVGRRT**-----  
Ag **LNASHDALLP**-----  
Da **TKLSSAEAAHG**-----

1276  
Hs -----DDEEEEEEDKT**VKYS**NLPNYLL**GSL**STDFGV**DTSL**SS**QLE**LHS**R**E**E**KINQ**IIL**  
Gg -----TE**VMAG**DTAS**CCL**VG**SLSS**QY**GAD**TS**ILY**H**Q**LDLHS**R**E**Q**KINQ**IVL**  
Xt -----EE**SVSK**Q**DSS**LV**GS**LD**LY**GG**DT**S**Y**LS**Q**LILHS**R**E**E**KINQ**IIL**  
Dr -----V**SL**TES**PAL**T**GSL**SS**LY**GG**VN**P**Y**LN**Q**FN**LHV**RE**Q**KIN**QITL**  
Sr -----D**SK**TES**PAL**T**GSL**S**ALY**GG**VSP**H**LY**S**Q**FN**LH**IRE**Q**KIN**QITL**  
Ci -----**QGG**DEDEE**EEKV**GL**SL**HL**GS**L**PNYS**GG-----EM**FYS**Q**FD**L**H**T**R**E**E**K**ITQ**I**L**  
Tb -----P**SD**V**DE**LL**YD**T**L**D**VY**T**G**P**RAT**I**Q**I**L**  
Tviv -----D**IF**L**ED**N**T**ALL**YD**AL**D**V**Y**T**H**S**RA**I**I**Q**I**L  
Vc -----**FMFR**GS**AF**ES**AG**D**GDD**N**YD**GS**TP**TP**DA**AAAAAAAAA**VA**AAAA**SAT**GA**AG**S**DP**DT**LM**YS**DF**DL**H**C**N**TR**AL**Q**I**L  
Cr -----L**ID**FD**V**C**N**TR**KAL**Q**VL**  
Tt **AGQ**FG**GR**AR**H**GA**AA**Q**AK**KEE-----**KKV**EE**VH**HEE**KEK**KE**VEE**KE**EE**K**DE**D-----DL**GE**W**DF**L**Y**G**A**F**EL**FT**N**NR**K**NQ**I**I  
Pp **HGH**GH**GM**GR**OR**F**N**Q**AK**PK**QO**VD**LK**V**D**KE**EE**AE**OK**KE**Q**E**K**Q**E**SON**EO**EN**NG**ES**AL**NE**W**K**Y**L**G**A**EL**FT**N**NR**K**NQ**I**RL  
Pt **AK**PG**V**GG**VO**ON**IK**OR**Q**Q**Q**Q-----**Q**Q**Q**Q**EE**E**K**R**Q**EE**E**K**Q**E**K**LE**K**Q**Q**-----**Y**E**EL**T**EW**D**Y**L**G**V**S**E**L**FT**L**NR**K**NQ**M**IL  
Lb -----V**P**GL**Q**IM**S**K**TAT**P**AD**G**SS**S**G**T**ED**L**DA**AM**L**N**D**AD**VY**T**Q**S**R**M**V**L**Q**S**L**  
Ag -----**W**K**P**T**P**T**Y**OL**ES**IL**NR**D**PE**Y**AN**EL**N**L**AR**AS**LE**K**S**Y**AL**S**G**T**T**H**OFF**O**P**Y**AL**R**YD**OL**EV**V**T**F**E**OL**Y**F**E**L**I**Y  
Da -----**K**A**IP**P**T**K**Y**Q**ER**E**P**IE**K**AS**E**K**V**L**N**L**L**K**G**DD**N**D**EE**E**K**F**AL**S**G**T**T**H**R**W**IR**E**D**P**S**R**V**N**Q**IL**RD**G**SH**CE**G**V**K**R**N**IL

1361

Hs LKDIYKVKTVFNNEFDAAAYKQKQEFETARVVKERNVRIEILDLLELEA-VWQPEFFE-----DCEKPER-TLVVQDE-E  
 Gg LKDIYKVKTAFNKEFDIVAQOKEQETARIKERNLRIEILAOLOVE-VWEPGLT-----CDENPEQ-VLTVQDS-E  
 Xt LQDIHNIKKAFAFNKDFDIACROKEQEVTRVKERNRIQEIIMVELNLQEK-LLEPTFT-----DNEKPER-ALTVDSD-E  
 Dr LKDVIYVKSFAFNKEFEAVYKQKEQEIHRITKEKNRIFOIMAKLGISET-LWEPRLT-----DNECER-ALTVTDSE-E  
 Sr LKDVIYKVKSTFNKEFEAVYKQKEQEIYRLREKNRRISEIMSELDLSET-LWEPRLT-----DNECER-ALTVTDSE-E  
 Ci VKDAIRRIKSSFNFAFTNIFRNKEQETIRTRMERNVRIEIMKELDLADSVKDPQMD-----VDEKPEK-VFIVTDD-E  
 Tb LECKILHEKKSFNIRFDLTLRERKSRELNLIAERNRCVRIMQOLGEHTCPPNVLFTP-----VFDIIEE--  
 Tviv LTGQTRYLKKAFNSRFDALRERKRRELGLLIEERNDRCKRILQOLGDTTCLSDILFTP-----VCDPNED--  
 Vc LRQKIRNLKVTFNDFNRVAAQKRSDCDRIADLNARMDFTVKDLRKMGGGFG-----RVRAT-VLSVRDE-E  
 Cr LKQKMRDVOAGFNDFNKVAAAKKADCDRIADLNARLDDTLKDLRKLKAGPPAGLLDERFSLSAQODTRDNIAAT-VLMVREE-E  
 Tt LONIIFKVKKEEFNKEFDKMMOOROVQVDMIAEKNKRIQEIILHELHKEEIEFEPN-----KNILENPER-VLEVDPS-E  
 Pp LHNIIFVSVKKEEFNKEFEKMAORSKELDOIQRNKKIEEYILELHKEPEYQEK-----QNILEOPEKNILEVDPEKE-E  
 Pt INDVIFSMKROFNAEFELIQKORQOQLDNINERNKRIEINGELKRDPOQLMK-----KNILEDPEK-ILIVKPE-E  
 Lb VKGRSLALKDAFNTRFTDLQDLKROSMOVEERTLRCTITIGKOLGSLPAOLFATAVD-----PEENPNS-LFVVEDK-E  
 Ag GDLEIEKLRTLFNEKFEQIKTLKHEEMELVLRNRRARYVQQLVFLGNLMADRNFVTEIETPKYAADERPDT-IHTEDSE-E  
 Da GKIREEKLKHFNKLFEAMHSRKSSEIKLARERARIDHCTLELRQMFQVDC TVDHSWLKLEWQ--ESERPES-MVEVEDE--

1446

Hs ITAHKHIKPPWHKAK-ELIVNHEKEHWLLIQDASTRLRALMDMMGGVLEVKKEDILRMVPIQPAFMA-----  
 Gg IKVEKYLTPQEREKAEMLTRLEMER-HLASLDNERORALNDMMGGVLEVKQEDILKIDIPPPSFIS-----  
 Xt VKVERYLTPQEKAKAEKLAKKEEAKRLAEQEDNAKORALDDMMGGVLEVKKEDILRMEVPOPGFIA-----  
 Dr IKVEKYLTPQEKKEEQLREEDKORLAAKSDNMRDQALSVMMGGVLELRKEDVLRMEVPOPEFMS-----  
 Sr IKVEKYLTPQEKKEEQLREEDKORLAAKSDNMRDQALSVMMGGVLELRKEDVLRMEVPOPEFMS-----  
 Ci VITVERVLSKEOKEKEEOERVEQERKEAAKODNKRERALTDMGGVLEVKKEDALKODIPTPDFMDE-----  
 Tb -PQTVFEVFDSEIDPELLKLAVKSDDGELVVSDEAALKTWMGDLEKVTLEVLRVNVPPIPF-----  
 Tviv -PTAIFEVFDSEIDPELLKLADKTDDNAYVMSANEAAKLTWMGDLEKAVLAVNVPLPPF-----  
 Vc VGVERYITPEERARKEAARRAEAEATKRSARDNAGERALRQMMGGTLPARGG-GVDGDGNPF-----  
 Cr VGAERYVSPAERAKQEAARKADEDAAKRSKADNAGERALRQMMGGTLPARGG-GHD-ESNPF-----  
 Tt IAFKKFLTREEREKIERDRLREERORALKQDDAGVRLKDMGGTLEKKENPLDEGLEMEEWMN-----  
 Pp ISFKKFLTREDRKKIEEARLKEEERLKALLADDAGRRAVOOMDGTIEEKKENLLDEEIKKEEWM-----  
 Pt IGFOOYETREMREKKEQERLKEEARLKALMADDSGVRAVKDMMGGTLEEKETPLDEKLEVEEWM-----  
 Lb LSAAEQALIASMGATVVS-PVDEAALPLWMDGLEKEVVRLEHVPLPDFADDTTRDTFIPPE-----  
 Ag IPVAPYISPSVERLLELEERERRELEDDFKDRALVTMMDGVLEHRWEDEIKKSLPLPOCLVFEAICGQYRLTLFVVF-----  
 Da EVYRVINDSGSEANVKRLDNSVTRRETSVLADTFRITGELKMMMDGVLEVKWEDEIKKDIPRPDCLMK-----

1531

Hs -----KPDVAVTTEERKQFKDYKVKELNEERDKYRKSLEAELKKLONSIQESTQAFDEHLKRLFERRVKAEMVTNQEELKISN  
 Gg -----KPEDEWTAQEKKIFREYEEKVKELNEEKYRRTLKNKLEELASIQEMTQNFDKTVCKLFRKVNLEKVIYQEEELKIVN  
 Xt -----RAEAEWTDDEKKQFKKEYEKKCKDLSEEKEYSKVLEAEMKKLQLSVIEETTSQFDDVLARLFEKKVKSEMAIYQEEELKINN  
 Dr -----KPEAQWTEERKSFKEFEKAKELSEEQEKYRKTLETMCKLLTSIKEATQMFDEKLAKLFRKVKSEMVYQEEELKIAN  
 Sr -----KPEVOWTEERKSFKEFEKAKELSEEKERYKTLETMCKLLTSIKEATQMFDEKLTKLFRKVKSEMVYQEEELKIAN  
 Ci -----KLEKDWTDDEKKKAKEHOKKLDLOEEREKYRKNLENELKLOONNLDAITNYDESLOOLFNRKVKTEMVVNOEELKILR  
 Tb -----ADNSLEQYVPEE---ERSDEQORIFEYKEVAEQTVLINEKELLRGEVAALVKANMTSAKAIDDEIDVLRITDRML  
 Tviv -----ADETLDOYVSPD---ERTDEQORLYEYEQVVEQITLVNEQKEALRQELVALKKANDASCALIDGEVVALGDERMK  
 Vc -----SLPPPPWLAAMGLDPTVNPKMLSEEQARELKDWAQAREKNLOEERARRVGMLELRTAKAAVEDVVGRFDEALAG  
 Cr -----SLPKPAWLVALGVEPDVAVNPKLITTEONRELKEWQAKEKSLQERAKRITVLEMLERTAKAAVEELT-----  
 Tt -----KPLEEMNEEERVRFKYEVVKQRLEEEKIRKNLENELKLLKSDVNEICQKFDKLLITFKRKLFDYRVEQELYIVK  
 Pp -----LPEEELNDEOKIKLKEYEVNLOKQOEEKDKIRKNLESOLKLLKQEIIVEICQKFDKLLILFRKLEFDYRIYEQELYIVK  
 Pt -----KSPDDMTEEERMKLKEFEVRKQKLEEEKIRKNLEAELKLLNEITDICORFDDKLLILFRKLEFDYRILEQELSIVR  
 Lb -----ERTEEQTRIIIEAYAKRLKEENECVEAKREALRGEFKSLOEKNRETAAKLDEQLHQIRQLRINTAAEVDEAELQLAL  
 Ag LQEIQKEPOHYNETDIREVNEYEDOSRVLHQRERLRYRKMLODELHELALISLDEQIKRFNTAVAKLTLQKIVIEAAIRQEEMLLR  
 Da -----DPSSCSADDLRIIKNYEALRRLLEGEREKYRKCLEKEIEELTESLKSSTHFNREMEFLYKRLKVE SAVLQETLMRLR

1616

Hs LAFSLLLDDEELSSREKFLNMYLTKRQHEKSO-----TSEAVRKSREDLDVCKEHYDNLLAEDKVMDRSFKKFESE-IPGHQVDIL  
 Gg LTYSLLLDDEELDREAGLRYFLVKKQKEKVK-----IARTVEVTKRKIEFYTDQYDNAIAEDKNLEYGFRKEFAH-VPASLLGEL  
 Xt LLSLLELIEEIEINTRVAHLAHLIDKKRKOQNO-----TAEIVKSFKTQVLAFRESYDNLVAEDKLLDRGFKKEFS-ITSYQVDQL  
 Dr LVLSIQTEEEIILTREKQLSFKLEKARIKKNE-----IGEELKHKETVDEFREAYDNTVAEDKLLDKGFRKEFYD-VPGHSIDQL  
 Sr LVHSIQTEEEIILSREKQMSLKLEKARIVKNE-----IGEELKHKETVDEFREAYDNTVTEDEKLLDKGFRKEFFD-VPGHSIDQL  
 Ci MTQAIMVADELATHEDQLNKLLELKNKFKAS-----SSSRLEDIOMLVKDYEEINDSTIAEDKMLDRAFKRDFS-VPLSISDQL  
 Tb VAQLVDELELHQVN-----ALCLFLLKKTIRNKFLGVKREEDLLCRLRQ-LDSLIEYRQL  
 Tviv TSQOVDALELQOVN-----ALGRFLQKAIYREYVSVLQEKAVDRCRLEQ-LKNLESHRQ  
 Vc LAARRHR-----VAAVAALERTLALAGLARC AKTSEAVEKOLLARLGA-AKEAHGRA  
 Cr -----SEAVRGLLARLGA-AKEAHGRA  
 Tt LAQOILKOONIIIQLDQYDVTINKLTDQVRKQANREILHEFKQEV-----ONKNLQDQYQNSLVNPKPSYGVDPNK-IRNIWVYAF  
 Pp LLSLMIEDKYLNIKLEETSELSKDLSDPPSNKLGAGIDEFYQELARROOLOREAQNYFKNERALGDLOGLDLGG-LGLIWTKVF  
 Pt LALSIIISQAQLRVSELEKHLHDEMTAQLNQLQOMKNNLDQTRDLTQ-----OORKTLNDQIVNYFNRGOTAGMDANK-VKILWOYAF  
 Lb LFOHR-----LCVSAAYRQHOSMAQKREALRDGRTE-AEFIVAQQK  
 Ag ATLYNHARLVYDANVARLRAQIEONADYTDQ-----LTEVLNEFOEKAADYRNTYDTRTKDRLLDKQFKINFSDTAQSALVDOA  
 Da ESORHHLRLKGMFAFAHLELNLAPAQERTK-----KLIDSSALESNVNESRVRYDNLKSRDKLLEGGFRGEFTD-LKQPMVDHL

1701

|      |                 |          |               |               |                       |             |                     |                 |
|------|-----------------|----------|---------------|---------------|-----------------------|-------------|---------------------|-----------------|
| Hs   | YKLFKRRPRISKOK  | -----    | THSETTSVVPFGE | LP            | SGSLKLNKDAFAOLMKAMDEL | DNISNMPEG   | -----               | LDPLVWNH        |
| Gg   | VELYKCRPRTVMTE  | -----    | IYLATANRSKSS  | --            | SVSAEDYKDALSRLMKAMDEL | DNPKHMPNG   | -----               | LDPSIWEK        |
| Xt   | YKLYKRRPRVORLR  | -----    | TQTDAAAPFGERP | GS            | AKANKDS               | --          | IALLMKAMDEL         | TPENMPEG        |
| Dr   | YKLYKRRPRVORMK  | -----    | TQTE          | ---           | PFKEG                 | ---         | AAPSDGLSLMMKAME     | ELDAPAHMLEG     |
| Sr   | YKLYKRRPRVORIK  | -----    | TQTE          | ---           | QFKEG                 | ---         | ALLGTAPSDGLSLMMKAME | ELDAPENMPEG     |
| Ci   | YKLFKRRPROOKPR  | -----    | TLAERSNSLDPY  | GV            | SDFSAEVTIFSTODGLAELD  | SEVNIPEG    | -----               | VDSALWER        |
| Tb   | KLYLASEARVQDCI  | ---      | EEENM         | ITDMRCLPPFTDP | DWGERLNR              | RFTTWR      | SKYEDGLAKVPE        | PTRS            |
| Tviv | SLLTSAEEDAQORI  | ---      | DDERSLISNMRHS | PPFSD         | DPDWDGLYRRFTKWC       | TRYEGGVAKV  | PNP                 | GONGV           |
| Vc   | ADLTERRTALTELE  | SKHAAAAA | EEROLD        | RNFKEFV       | DADLHFN               | LLHMYRARRSE | QLVAAAMG            | ITPEG           |
| Cr   | SELSERRAALAELES | SRQAOLG  | ADERLMD       | RNFKFE        | AEADH                 | LNRLLOL     | YRARKPE             | OLASMPGGGKPEG   |
| Tt   | EEOKKDERKKKEIE  | --       | DKIMNDPKYRNE  | LQKLD         | PFIELN                | KEIKKKLD    | GIFDSYVDDIRE        | KITNMOMFE       |
| Pp   | KDOKSALEKKOOE   | --       | EKLLK         | DENYKSEL      | VELDPL                | FDIKNN      | IMKSOON             | DFNNYKLDIQOKATS |
| Pt   | EDOKTNERAKOQOD  | --       | EKLLK         | IQYKQ         | VDLVIQ                | IDPLFEN     | OKKII               | ISAQLDEQFETYLF  |
| Lb   | HLLRAAQARLAAA   | ---      | SKTGGY        | AASVRALAP     | FEDGTT                | GKELHRR     | FVRW                | ORRFVDGSAPLPDAD |
| Ag   | YKIFKRRPKTOLRS  | ---      | IVTVSV        | FQDMAKR       | IVAKKTP               | GTHGN       | LLLPKEC             | ODYLAHCE        |
| Da   | LRHYKRRPRLGOLT  | ---      | CTSIT         | YLT           | EMGK                  | CILS        | GEKSE               | ILPRECLDYSK     |

1786

|      |                   |               |        |        |        |               |        |         |         |       |        |       |
|------|-------------------|---------------|--------|--------|--------|---------------|--------|---------|---------|-------|--------|-------|
| Hs   | FCMTRRAKVENEQVKOK | KAADLLEMATFLO | KRV    | EEEEK  | VQO    | EIERVFHELILLO | EEKVRF | QNLNTIQ | ILLKQGO | VELEN | -      | FOLVL |
| Gg   | FCLARRNKLESEQLVK  | WMALILAEIE    | VFLO   | RID    | NEK    | MSSKIENIF     | KELIWL | QEEKIK  | LQVNL   | TFO   | FLKQGO | VEVES |
| Xt   | FCLARRSKIEYE      | QOVKIKAL      | VLAEMO | AFLDKR | IEE    | DEKIRO        | TENIM  | ELN     | VLRSE   | KMK   | FOLD   | LTVO  |
| Dr   | FCLARRAKVESE      | QVKLKAL       | TLAEMO | AFLORR | IDE    | DEA           | QLEIK  | NLIDEL  | NGLC    | DEK   | MR     | FR    |
| Sr   | FCLARRAKVESE      | QVKLKAL       | TLAEMO | AFLORR | IDE    | DEA           | QLEIK  | NLIDEL  | NLSICE  | EM    | FR     | LD    |
| Ci   | LCNARRNKVESE      | SNVKOS        | VTTLAD | MMKYLH | HHRONE | DEV           | LEHS   | ID      | VIKOOT  | KL    | CE     | DS    |
| Tb   | YCQCCRAVVEAR      | KIHLR         | GEADAL | NDE    | VVE    | TE            | KKKAQ  | FALDD   | KEA     | EE    | ACR    | KE    |
| Tviv | YRECCI            | AVVKA         | EIAHET | ERVH   | OYHE   | CLVAV         | VEKSR  | LEEIL   | TR      | KKKA  | AD     | ACK   |
| Vc   | FTLYR             | SSRLE         | AEAAVR | ATO    | VDL    | LARR          | DLPE   | LES     | R       | EAG   | L      | ATE   |
| Cr   | FVAYR             | AERL          | AAEAG  | ARA    | AGD    | LV            | LARR   | DLPE    | LES     | R     | E      | AA    |
| Tt   | IKDVL             | QORF          | OFK    | ELDQ   | SE     | VEFR          | DINNS  | ITNF    | END     | L     | FAL    | Q     |
| Pp   | LYNLM             | RKKF          | ELE    | KEYE   | Q      | A             | EAN    | LND     | IDA     | CL    | T      | O     |
| Pt   | LLOVL             | SOR           | FR     | M      | K      | D             | Y      | E       | K       | I     | D      | K     |
| Lb   | FCDHC             | Q             | AV     | AEL    | Q      | LV            | ND     | A       | E       | A     | E      | V     |
| Ag   | L                 | I             | K      | M      | R      | I             | K      | I       | E       | S     | E      | F     |
| Da   | L                 | C             | K      | L      | R      | R             | S      | K       | V       | E     | I      | E     |

1871

|      |               |          |       |     |    |       |       |     |       |   |   |   |
|------|---------------|----------|-------|-----|----|-------|-------|-----|-------|---|---|---|
| Hs   | EYSDAILINKNII | EDLNSVIR | TQ    | GOK | K  | VAS   | MMSK  | DVH | KRILQ | I | E | W |
| Gg   | DYADAIFIKKSI  | EELN     | CNIM  | DQ  | E  | KKIAS | MVECK | E   | F     | S | K | G |
| Xt   | SFEDAILLHRS   | VIEDL    | NSTIR | GL  | GE | O     | IAS   | M   | V     | E | S | K |
| Dr   | DYSNALLI      | QRK      | V     | E   | D  | L     | N     | S   | T     | I | R | A |
| Sr   | DFTNALLI      | H        | R     | K   | V  | T     | E     | D   | L     | N | S | T |
| Ci   | DYSDSIL       | I        | H     | R   | G  | V     | E     | D   | L     | N | S | T |
| Tb   | DFTDFS        | I        | R     | W   | K  | N     | I     | T   | D     | Y | N | L |
| Tviv | NFMNF         | S        | F     | R   | W  | S     | S     | V   | T     | D | Y | N |
| Vc   | DMSDARLL      | N        | O     | A   | V  | E     | A     | L   | N     | A | V | L |
| Cr   | DMSDARLL      | N        | O     | A   | V  | E     | A     | L   | N     | A | V | L |
| Tt   | SITDAILI      | P        | R     | D   | E  | I     | E     | K   | K     | N | R | I |
| Pp   | S             | M        | E     | A   | I  | L     | I     | T   | R     | O | T | I |
| Pt   | N             | L        | O     | A   | A  | L     | P     | R   | E     | I | E | K |
| Lb   | A             | F        | L     | S   | S  | N     | L     | R   | W     | R | D | D |
| Ag   | D             | F        | D     | R   | C  | V     | L     | I   | H     | R | T | D |
| Da   | D             | L        | D     | N   | A  | V     | L     | V   | P     | F | D | V |

1956

|      |             |    |     |    |   |   |   |   |   |   |   |   |   |
|------|-------------|----|-----|----|---|---|---|---|---|---|---|---|---|
| Hs   | LISIQIGIMEQ | TI | AVL | DK | M | H | K | N | V | E | N | C | K |
| Gg   | YMAHRI      | A  | V   | M  | E | Q | T | L | A | V | M | D | K |
| Xt   | RISDQ       | I  | O   | V  | L | E | A | T | L | N | A | O | E |
| Dr   | R           | V  | S   | K  | O | L | T | T | L | E | R | T | L |
| Sr   | R           | V  | S   | K  | O | L | T | T | L | E | R | T | L |
| Ci   | K           | O  | S   | O  | O | V | A | V | L | E | O | T | L |
| Tb   | S           | L  | E   | R  | E | I | N | K | M | D | A | R | I |
| Tviv | S           | S  | G   | E  | E | V | E | K | L | K | N | R | I |
| Vc   | S           | T  | A   | E  | A | A | S | L | E | A | L | M | K |
| Cr   | S           | S  | T   | A  | E | A | A | S | L | E | A | L | M |
| Tt   | L           | N  | E   | S  | A | L | K | N | L | O | E | O | I |
| Pp   | L           | O  | E   | E  | K | L | O | D | L | S | N | O | I |
| Pt   | L           | N  | E   | R  | E | L | A | N | L | K | D | O | I |
| Lb   | S           | E  | E   | K  | M | A | L | H | L | O | R | H | M |
| Ag   | S           | E  | D   | F  | S | O | M | A | L | E | K | I | R |
| Da   | G           | V  | D   | K  | D | H | I | T | E | K | S | I | L |

2041

Hs --KIVKERYENMMOQKLTNISKQOAEQISILQTEVERLRMKTFFPALVQM-----  
Gg --RIAKRRYQEIFLKQKHLRGLIEEQEKHLDILQAEAERLRSKTFPTL-----  
Xt --KAAKERYVEIVORRKLVDLAKIQAOEIIELRTEVDRLRMKTFFPALVQMEY-----  
Dr --TESDKNYODILLRKKLLAIARAQSEELLLLRAELEKLRMKNFSPSLSOLHYN-----  
Sr --TEAEKKNYODIILRKKLLNIAGAQSEELTLQAEVEKLRMKNFSPSLSOLNYN-----  
Ci --NTADKRLKGVORRKLVDLAKAQAEVAVLRAEVERLRMKTFFPALVQVER-----  
Tb --DRLRERMRELYENSELEELARCOQEELVRLKNEVDRLREATFSPFAVVTRRTAR-----  
Tviv --DRHSERMKELFEHSELGELARCOEELIRLKEIEILLRERTFSPFAVVSKRTRVRO-----  
Vc --EQAARRMRSVLVTHKKLKEIALAQONELADLRGQVEKARLRITYPTFVELRNVAGMPTLPQRLPPDLKLMRARSEADRACGDSN-----  
Cr --DQATRRMRSVLVTHKKLKEIALAQONELGELRQOLEKLRRLRITYPTFIESGAVAGMPPPRRLPPDIKLLAGSPSSSSSVAGRT-----  
Tt --TDFEAYDKFKOIMNNRQLFTRVKROTEEIEELLREELGKLRKARTFANFTAVQKY-----  
Pp --DADESRRKKFEAIARNRKLVDLGRROIEETIEAFRDELNKLKAKTFANFSVVK-----  
Pt --QQEPQEDKFTQIARNYRLFKKAKEQAEIEIEILLRDELTKLKAKTFANFOQVHR-----  
Lb --HARAARAKEIFCTSELEELARSQOEELVRLKHEVDRLRERTFSPFAVVSKOTR-----  
Ag ---ATQDRMTAIVERARLVRLVQAQHTHILELGTMLELQRLKTYPTLTASTSVMTNHHLLGN-----  
Da ---FVRAKLKAIMKRNRVLVKKIKDNYAELTSRLTQLELLRLKTYPTLRLKLDARHLRKN-----

2126

Hs -----  
Gg -----  
Xt -----  
Dr -----  
Sr -----  
Ci -----  
Tb -----  
Tviv -----  
Vc --VLCFDKICTPSHVPYLSDDVYATAMRPTPPGQ-----  
Cr -----  
Tt -----  
Pp -----  
Pt -----  
Lb -----  
Ag -----  
Da -----
