# Supplementary material
Source: PubMed Central journal article supplement (PMC11105627)
Supplement: 18_2018_2819_MOESM7_ESM.pdf [file 18_2018_2819_MOESM7_ESM.pdf]

# FAP44

1

|    |                                                                                          |
|----|------------------------------------------------------------------------------------------|
| Tt | MSDQGLNDQOOEFFONQPEVIENNQDEFGOSQAONEVDONQOOESFKLENPADPNFPVEDATTLNKKQVQEQENLAQSEEQSOOKSN  |
| Im | -MSEEQOPIIENLSPNKLVEEKKEEVLOEEOTIETVNEQTEQYKELIEIKOHEELHIOQEITITOTINNTTQOITEQYKEVVQKRKQE |
| Pt | -----MDEDQKDONSETIQMKRADSOAGVLEMOPPOIGVEOTSQOVPEADQEDDDQVVOTQVVOGDOQVQK                  |
| Hs | -----MKEPDDQDIDGKSVTSKSDGKSLRSSKSESRSPVQEDNTFLEDDTDETF                                   |
| Rn | -----MGKIRVKELREAFPESDSERNKWSLLCIHEAAEDITDDLF                                            |
| Dr | -----                                                                                    |
| Gg | -----MSSPNEQEGADEKPAEGTPADHSSVQESE                                                       |
| Cc | -----MDD                                                                                 |
| Da | -----ME                                                                                  |
| Tc | -----                                                                                    |
| Cr | -----                                                                                    |
| Vc | MLVSTAQLPALSTPDLKDTGSLVEGMAVDVRVLQDYRAPEDGPEGTDPGTGASSSRATDVSPPEADNVRPQDDIVAADPASTVT     |
| Tb | -----                                                                                    |
| Lm | -----                                                                                    |

88

|    |                                                                                           |
|----|-------------------------------------------------------------------------------------------|
| Tt | IKGSASSOMEQSVAGQNLPLDNLGNASIIKOOQENQOEIDEMOEVEQEIPIKIPDDFFYEENHVETQIADSE---ISKNAAQFYEC    |
| Im | DEYEEVLVEEHIIEQEKNHQVEQDNTFONEEYAKNKVENQETPKPEGSODHLTDOFFYDENELESTVTDSD---ITROTVOYHKV     |
| Pt | SGAONGMNSQSNIHQSAIINKHVQDMLDQSVYQVPKNDEVDPKEDAPNPILDLPEDYPPDDWQENQDQTPPLIHPDITIQFHDC      |
| Hs | TKGEGSYLEEDSDEERLEGLSSFOYGDLOSTIVPQOTPAVAVEEAEEVKKKISEFFYDYMELASMPFVTLDSNIPDLDLLTLVHS     |
| Rn | IDGAESFLDDDLLEDMNESSHSSQ---EYFHTPVVSOEPPPELKEEPEEVKKKLSETFYDYLELIS TPYVSSPDRIPLYFLALNHS   |
| Dr | -----MDASETQDPEPSVKGVFDEDDDDAAAGGADEEHRLIPDQHYYSYEELRSRASVTEHSHLPQDLLQLSHV                |
| Gg | TGLPKESPAGGEQEDVEQVETDTESSIADDLQDNTQVSLKEGKSPEKEEKKISETFFYSYEDIYSRPFVTEDSGIPINLLTLKYS     |
| Cc | TDEDIENVENLPEDPESNIRVSETSIAIATRSEIFTTETSTEFQDEIESHEDKODIPPIHYDSQDIYISGPORTENGTVPMNILEFHHS |
| Da | VDQLKPTNGLFPEDDDD-----GENRSEFOSQVQDKNNYISGPERVENGSVPMNILTFDHS                             |
| Tc | MSQIDEGLEDLPEDEEE-----YEEEEEEEDHWSIYDASTFISGPYQSEKCTINEGVLFKDFDS                          |
| Cr | -----MPLMVLLLSORTGGVAOLLSV                                                                |
| Vc | AADELPPPSDSMAGPSTLATDFGGRAPAAPSVGPAAEAEFEFEGESEAUGVKEAEEGQELPVDGIEPVAADPAEELRAPVDSRAQILAV |
| Tb | -----MAAPAQAVVKEKPPIHVYPOAKIGTKIFTH                                                       |
| Lm | -----MASPAAAGAENRPKPLHTYPEDVPPSSKILAH                                                     |

175

|    |                                                                                         |
|----|-----------------------------------------------------------------------------------------|
| Tt | FGFDTAKKYNVSMLDNDNLIYSAGITYOIFNIVTREIRPYFSKDOGIGSIAVNP--KTHFAVAEKGD-----HPNIYIYEYPSF    |
| Im | FGFDSMKKYNVSVLDNENI IYSCGVTYQILNINTLQTOVLFKDGIGSIAVHPS--KKYFAVAEKGN-----KPNIYIYEYPTL    |
| Pt | FGMDSNKKSNLWLIDSQTFVYASSISYHFYFVQGTNEIFFSRDGGGIGSVAVHPS--RKYYSVAEKGS-----FPNVYIYDA-SH   |
| Hs | FGYDCRKRANLQLLDDSIAYIAGNQLIFLNLKTKEQIYLRSSSGEIGVIGVHPH--KTYFTVAEKGS-----FPDIIYIYPSL     |
| Rn | FGYDCRKRANLQLLDEHTLLYIAGNQLVLLDFKNKTQMYLOSSSGGIGAIQVHPD--KTYFAVAEKGS-----FPKIIYIYPSL    |
| Dr | FGYECGRRANLQLLDEHTLLYIAGNQLVLLDFKNKTQMYLOSSSGGIGAIQVHPD--KTYFAVAEKGS-----FPKIIYIYPSL    |
| Gg | FGYDCIRSVNLMVMSOSLLYVAGNOVVILDKTKSOSYLRSSSGGIGFIVAHP--ROYFAVGEKGE-----EPNLIYIYDPSL      |
| Cc | YAYDCQKHFNLVADPDTIIFASGNLINFNFSENKLFWRFGSTGGGIGHITKNPT--FNHIAVGENGI-----NPPIIYIYWPNL    |
| Da | YGIDCRRHFNLVADPDTIIFASGNLINFNFSENKLFWRFGSTGGGIGHITKNPT--FNHIAVGETGD-----KPPIIYIYKWPNSM  |
| Tc | FGYNCRKYFNLVADPDTIIFASGNLINFNFSENKLFWRFGSTGGGIGHITKNPT--FNHIAVGENGI-----NPPIIYIYWPNSM   |
| Cr | HGLDTHRRNNLVLLEDLTAASCIAGQLVLLSLSTGARRYLPGRDGGGVAVAVHPS--RTLLAVGEKARPGPASAGPAVYIYSPGL   |
| Vc | LGMDFHRHNNALLLDEDLTLVTCIGSHVVFVSLNTHRRYLRLDGGGVAVAVHPS--RTLLAIGEAKR-----GSTGPCVYIYAYPEL |
| Tb | HGIHSMRYNGVCALTGSTVLMASGRFVMFVDVHKGTIESMOGPEGGVAVAVHPS--ROYVVCERKP-----SDPAIRAYSWPSPR   |
| Lm | CGFDSRHFNAVAYLGDNTLLTSGGKFVLFVHVDGAVESQDGPLDGAAGVAVAVHPS--GTSYVVGRCPE-----ANPLLRAYGWSPR |

262

|    |                                                                                          |
|----|------------------------------------------------------------------------------------------|
| Tt | KLYR-----ILRKGTELSYSSVCFSSN--GELIAAVGSYPDYTISLWNWKEVIILKAKAFSDEVYSVNFSSNYSE              |
| Im | KLFR-----ILRKGTELSYSSVTFSSD--GIRCASVGSPPDYTISLWDWKKEMIILKAKAFSDEVYHVQFSEYSE              |
| Pt | KLYR-----ILMKGTERSYSNSNFSSK--GDKFATVGSPPDYQICLWDWQEKILLKAKAFSDEVYKVGFSSEYNV              |
| Hs | RPYR-----VLRDGTTEKGYAYVDFNYS--GNLLASVGSNPDYTLTIWNWKEEQPILRTKAFSDEVFKVTFNPDKE             |
| Rn | KPYR-----ILQDGTTEKAYAYVDFNNE--GNLLASVGSNPDYTLTIWNWKEEQPILRTKAFSDEVFKVTFNPDND             |
| Dr | RPYR-----ILRGGTGVAVSCVCFSSAD--GSLASVGSAPDYTLTLWDWRSERATLRKAFSDEVHRVDFCANGT               |
| Gg | KPYR-----ILQGGTKGYVFGDFNHT--GTLASIGSSPDYMLTIWDWKEKIVLRKAFSDEVYRVTFSPDNE                  |
| Cc | EIVT-----ILYEGTTRSYSHLAYSPD--GLLMVSQGGDPDYTLITVWDWQKSKIMLRCKSSGQDVFNVMFSPTVE             |
| Da | DIVT-----ILONGTKKNYSHLAYSPD--GKLLLSQSSPDYSITVWNWIKSMPLLRCKSYEQEIYNAIFSPVTP               |
| Tc | EINC-----VLKGGSSRLYSHLDFSPD--GLLLVSOGGEPDYTLITVWNWPKRRILLRCKSYVNDVHRVKFSPYCP             |
| Cr | EVVK-----VLRGGTERAYSALAFDGER--GDTLASVGHFPDFLLTLWDWRQEAIVLRAKAFSDEVYGVAFSPYFE             |
| Vc | KCIKICIFLVIAANRVYRPRASTLFGQCTVMAFTRMFIILRLIGDTLASVGSFPDFLLTLWDWRSEIIVLRAKAFSDEVYVAFSPYFE |
| Tb | TEVG-----EFVKGATKGFSAFANKD--GSMATVGMYPDFLLTVWDWESRGMVLRSKCHNTDVTYVLFSPFDS                |
| Lm | APSK-----TFAGGAEVGYSSTLAFNVD--GSRLASVASAPDYTLAIWDWENTSLLLRCKSFNSDVYSVAFSRFDD             |

349

Tt NILATSGLGHIKFWKVAETFTGLKLGKGEIAKFGVVELSDVIGYYIHODGKVLSTGEYGTLLWEGNLIKCVIYIDEETQT-----  
 Im NILATSGLAHIKFWKVAETFTGLKLGKGEIAKFGVVELSDVIGYYIHPDGKVLSTGEYGNLLLWEGNLIKCVIFIDEON-----  
 Pt NQLATSGMGHIKFWKVAETFTGLKLGKGEIAKFGVVELSDVYAFYFPFDGKVLSTGEYGRLLWEGNVIKVVIIGISEEE-----  
 Hs EQLTTSGSGHIKFWEMAFTFTGLKLGKGEIAKFGVVELSDVYAFYFPFDGKVLSTGEYGNMMLLWEGGLIKVELCRGTSK-----  
 Rn EQLTTSGSGHIKFWEMAFTFTGLKLGKGEIAKFGVVELSDVYAFYFPFDGKVLSTGEYGNMMLLWEGGLIKVELCRGTGMK-----  
 Dr GQLTTGSGHIRFWNLAFTFTGLKLGKGEIAKFGVVELSDVYAFYFPFDGKVLSTGEYGNMMLLWEGGLIKVELCRGTGMK-----  
 Gg EQLTTAGVGHIRFWKMAHTFTGLKLGKGEIAKFGVVELSDVYAFYFPFDGKVLSTGEYGNMMLLWEGGLIKVELCRAGHK-----  
 Cc GHLTSCGSGHIKFWKMAETFTGLKLGKGEIAKFGVVELSDVYAFYFPFDGKVLSTGEYGNMMLLWEGGLIKVELCKKKNKK-----  
 Da GHLVTSGSGHIKFWKMAETFTGLKLGKGEIAKFGVVELSDVYAFYFPFDGKVLSTGEYGNMMLLWEGGLIKVELCRKNNR-----  
 Tc GQLTSCGSHIKFWKMAETFTGLKLGKGEIAKFGVVELSDVYAFYFPFDGKVLSTGEYGNMMLLWEGGLIKVELCRKNNR-----  
 Cr GQLTTSGOGHIRFWRMASTFTGLKLGKGEIAKFGVVELSDVYAFYFPFDGKVLSTGEYGNMMLLWEGGLIKVELTRPGSR-----  
 Vc GQLTTSGOGHIRFWRMASTFTGLKLGKGEIAKFGVVELSDVYAFYFPFDGKVLSTGEYGNMMLLWEGGLIKVELTRPGSR-----  
 Tb GLLVSGGAGHIKFWTMAETFTGLKLGKGEIAKFGVVELSDVYAFYFPFDGKVLSTGEYGNMMLLWEGGLIKVELTRPGSR-----  
 Lm ALLVTGGAGHIKFWMMADFTGKLGKGEIAKFGVVELSDVYAFYFPFDGKVLSTGEYGNMMLLWEGGLIKVELTRPGSR-----

436

Tt -----KCHNGCINVVFKH--GDDIVTAADDGYIRFWDYATIDNSEDDFGNFYMKPNSEILIKTDD-----DRPA  
 Im -----KCHDGCINAIFKI--DNNIITAGEDGYIRFWDYATIDNSEDDFGNFYMKPNSEILIKTDE-----NRNA  
 Pt -----PCHKGAIESIFLY--KDCIISGGKDGFLRSWKLTDELDAEADDLNYYTQPIKSLELVDDG-----ENA  
 Hs -----SCHNGPINQIMLY--EGEVITVGS DG YVRIWDFETIDTADVIDETGLLEIEPINELQVDKN-----VNLFSM  
 Rn -----SCHNGSINOIMLD--EGEVITAGSDGSVRWDFETIDTADVIDETGLLEIEPINELHVDKS-----VNLFSM  
 Dr -----VCHSGAVQOISVE--EEELITVGS DG AVRSWSLESDAADAADDGVCIEIPMNEILLVGRN-----VSLVSV  
 Gg -----PCHNGPVSHIVLD--EGELVTVGKDGFRVWVFEAIDTADSVDETGLEMEPMNELRVGRN-----VSLVSM  
 Cc -----PCHDKOITOFEYN--NGELTSVGM DG WIRIWFYETIDQADPPEGDOFLEIEPIYEFHITTEDEDDYDAEOSSMLMCIO  
 Da -----PCHSKMITOFEYC--NGDLSIGMDGWL RVWSYETIDQTDASDKGFIEIEPIEFIEINIEKNVFDTGSTSSMIMALE  
 Tc -----KCHDGPVIVISYN--EGELMTVGM DG HVKVVWVYKIDQADPDDDRVIOIEPTYDFHTEGL-----MLMCMR  
 Cr -----PCHDGPVIEALLDRPAGRVLSAGADGRV RMWDFGAVNDAEPREDSHSLELSPLEVVVAEG-----AAL  
 Vc -----ACHDGPVEVLLHDRASGVILSAGADGYR VWFDFNOVNDAEPRDGHSLKLPDEVPVAG-----AHL  
 Tb FMARSYDYTPCHEGAINVVELMEGGRVLMTAGDDGYRFRWRVSELEVAEGEGAPPLYVPECLGEILVHAG-----AFI  
 Lm QPPHDIQ--PCHDGAIHVFSLQ--GRYVVTGGDDGYIRYWDLHELEVAEGTGLPPYYAPNCLHEVCVSSA-----FRV

523

Tt NITOILVQENFWIVIDANGRIOKIKISENKT-----DYEMETLLEMN--SGRLNDIIVSPIONGAITVGGDGA VRLWDYVORKE  
 Im NISQILLTDNYWIVIDFNKIKIKLCKDNYT-----SSEQTILETN--SGKLNDAIVSPTQNASVTIGDDGVRLWDFVNKRE  
 Pt QIIQVVTDEHFWLIGDQGRVVRVDWETGKK-----EIVYRNN--SGAYLDLAPSPQLNAAITVGGDGAITLWDYVKSEQ  
 Hs IKMNE--TGNNFWLAQDANGAIWKLDLSFSNI-----TQDPECLFSFH--SGAIEAVAVSPLTYLMATTALDCSVRIYDFASKTP  
 Rn IKMNE--VGNNFWLAQDANGAIWKLDLSFSNI-----TQDPECLFSFH--SGAIAALDVSPLYTYLMATTALDCSVRVYDFASKNL  
 Dr VRSPV--SSIWFAQDAHGCIWKLDLSFSNM-----TQDPECVCCFH--AGPVQGMVSKSSHLMATTALDCSVRVDFVLSKRE  
 Gg SKIHD--CGOPFWYAQDANGRIWKLDLTFSNV-----THDPECLCTFH--SGRIEAMSVSPM TYLMATTALDCSVRIYDFISNSO  
 Cc KKNIEDAEENFWYAQDNGRLLWIDLNTFET-----PERPKIFTCH--AGPI TDMVATWGPVFVATIGRDAHLHIYNYFDKTL  
 Da KKYPEDSEDKKWYGDGNGGLWIDLSTFDEAVNSDDKFPNATRLLRCH--AGPVMDTACTWNLVATIGSDCQLHVYNYANRKL  
 Tc KRYP--DPKDTSYFGODGNGGLWIDLNTFET-----PKESVQLYKCH--AGKVVAIATSPNGPYLASLGEDGRIYVYAYLEKRL  
 Cr SALLADSGRRVWVADKAGNVYTVLPPAGP-----VGKGA VTRVASHPAGAVAGLQLSARTH TALVASADGCLRALDYVSGAV  
 Vc VSLLEW--GRRWVAVDMAGRIYVVALPVSGA-----ISKGASILCAGRHPAGAVAGLVLSPRSHVCI IASRDGQMRVLDYRTGAI  
 Tb RSVTYCKDVDEWVVLDSAGVLRVPYVHPDDILNNAVTKPKEQAVPALEFN--GGSITSAALSPIDHTVVTGGEDGTIRLVYVTPRE  
 Lm RSVTLDEEHRQWVILDEFGTIATLPYPLRNG-----KLDITRVRQVRLRLN--GVPLTCAAVSPVEHVVL TGGMDGVVRCIDYVYCAE

610

Tt HYHRV-----FOGKATCAEWLPYTMKNK--SARIILAGFSNGIVRWLLLNQ-----NGFHLLRATKVHNES  
 Im YYSRK-----FPSKGTCEVLAHTRKN--GGRVVVVGYONGIVRYLLLNQ-----ITFTLLKSLKVHNKA  
 Pt TYKRR-----FAKKATCIOWMPFTMTN--KGRVVVVGYONGIVRFLLNQ-----DTFVLLNVOKVHPHP  
 Hs LAQMK-----FKGGTALVWVPRMVNF--TGAQIIVGFEDGVRILELYD--PKGLTIFAGRKKILDADIQLQVFKPHTAC  
 Rn LVQMK-----FKGGTTLIWAPLTVSI--SGSQIIVGFQDGVVRIELFD--PKGLTVFAGRKKLLDAELHLKYVFKPHTEV  
 Dr LTMSR-----FROGGTTLTASDAV--GGLLAVGFEDGVVRLLELYN--POGLHAVAGRVHSGDAELRLTHALKPHNAA  
 Gg QSEIK-----FKGGTALAWAPHVNP--NGSVIIVGFEDGVVRIIEVYD--PKELPTFAGRANIRNAEINLKQAFKPHTTA  
 Cc ILVHK-----FCDIGSKVWVPCGVEA--TGCTLVCAFSSGIRMITVSI-----LQANRTKKIKGDYVRLIQVVRPHKMP  
 Da VFAGR-----FNDGGSAMIWLPCLDK--TGSTIVCGFHTGVRVVTGFI-----NDNSGHVELIQVVKPHTDE  
 Tc IGHNYQ-----YPAGKTCMIWVPPKLA I--YGDELLMGFDHDTLRLSILTI-----NEDKKEVRIQTTKPHDKP  
 Cr LAEAA-----IPORITAFTPLAASPACPGAMTATGYR DG VVRLHARCA-----EGLALVGVAKAHKGA  
 Vc LAEAP-----GSQPI TAVAAIPASTGV--AGMVTVAGYR DG VVRYTRSGPLVLDLADPDGVDADTSPFPONLTLAGVAKPHKGS  
 Tb LYKMC-----LPOPNVVIGLRFKDP--EKKKFLACCKSGAVLLVKGGS-----TAF TLLGOWRPHNDG  
 Lm RCRMEWPRHPRKDPVPVADMKVLPVPRSTA--QSVLAVAGFGDGTVRLLEIGE-----GSGSIRMTGQWKAHADG

697

Tt IKFIKVS PDGSI I AIFSESGDIFLIEQ-----HPSDFOKIDPFCLETFKFKI-----NSVVWDRMGEK-----LLLACDDGNI  
 Im IKYIKASPDGSI VAVLSIDGNLFLLEN-----DPSDIKKLEPICLFDTKLOI-----NSMVWDRNGEK-----LLFAAEDGKI  
 Pt IQKIIVASNTNYAVLSTKGEIFFLKY-----SDSNIQDIQAYCLWETKLSI-----NDFCFDKTGTK-----VLMACKDGYL  
 Hs VTALAYERDGEILATGSKDQTVFFFEV-----ERDYKPIGYINTPGPV-----COLMWSPPMSHPEST--LLIICENGYI  
 Rn VTALAYERDGEVLTATGSDDKTVFFFDV-----EKEYKPIGYFNTPGPI-----RQLMWSPPMSHPEST--LLIICENGYI  
 Dr VHAVTFDSTGHTLATGSDGTVFFFAV-----GDSYRPLGFVFCVPGPV-----RSLQWAPPHTEMST--LLVFCADGHV  
 Gg VTALAYERNGDVLATGSKDKTVFFFAV-----EDEYKPIGFIVHPGPV-----QALQWSPSHVASM--LLIICENGYV  
 Cc ITSMSLNNTHSLLVTSGEDTIFVFFV--NTTATYPI LVP IGFVVPSPV-----TCMTWKP--NHDMT--ILVGC LRGDC  
 Da ITAIVANPPAKLLITGSKDSTIFLFSI-----EVHEFINLTPIGFVEIPSAV-----TRITWKP--KNSST--ILIGCAEGHF  
 Tc ITQISINPSNVLVSGGEDSTIFFFOI--KFTIHVELVPIGYIRVNPV-----TCLTWHC--VNPYV--ILVGC LRGEM  
 Cr VAALAVSADGRLVSGAGEDSVFFFDL--TAQPOPGTGVPMPCGLLAPAFIKLPSGSGTVTCGVWEA--AEGGV--LLGTNRGTI  
 Vc VLALAVSQAARLASCGEDGVFFFDL--SLGSTANGVPAAPPCGVLVPRAYVRLAQGTGTACATWS--ADGGV--VLLGTSRGTI  
 Tb LALFAVDAAEHR LCTIAH--GTVFFFTI-----LDDFSSLEPIGFCKIPLPGA-----TCVAWDD--ASSC--CLIGFECGKL  
 Lm LCALAVNEDASQVASISPSGHVFFFSV-----ETAPCTLDPVGYCVGPLQNP-----TSAAWDTQAVGGHGGC L L GFE G G Q L

784

Tt HEIMVPKKD--QCDTSETYLKEFR--SRSYKIRMME SOKPKTEEMELEFLLRR-----  
 Im YETOIPKKE--NCDTSETYLQNFY--AKSYTIKMMFEOKPKTEEMELEFLLRR-----  
 Pt YEAIVPS--DVDNSENLYOEFN--ANKYLVRMME SOKPKKEDLDLOFLMK-----  
 Hs LEAPLPTIKQEEDDHDVVSYEIKDMCIKCFHFSSVSKILRLIEIEKRERQRELKKEKIREERNKLAEM  
 Rn LECLCPTIK--DVDDONLVTFAIPDMLVRCFHFSSVSKILRYMEVORREKQKELREKEREERKRKLMEEK  
 Dr VELOSPAAD--TOICGNSFQLTALPTMHFCFSSIKSRIRKDEAVALROARTAEROKOOERLRKLEQN  
 Gg LOVPAPLPE--KODTASTYHIKNLPTIEYFHFYSIKSRILEEEIALRERKKQEKAKLEWIKOLOEMG  
 Cc VEVTLDPVP--QNYTKMSYELVRCLELRFKFSVKSARRALIQAEIQKKKEEKLAKKKOALEQLRVDN  
 Da GEIQVPEKF--PSNDEHRKTYRLDEYRAKFLKFRSVKSALRREMVROENEKVMKREEMRKKLDEYRSLN  
 Tc VQVEVPKEP--OPYTTVSYLLDLEPKTNKFKTYKAOIRRDLLKEIEREKAQVAKRVEKELKAEN  
 Cr LSVLPPPPD--LNTHHSYEWAAAGTSAVSSYQLVVPKPKRPKKKGKNDGEEGD-----KEGGEQDEGQGGEDKGGEQAD---  
 Vc LOVSLPPKD--FDTHHSYEWTE--AVVHSYNECVPKPRRPPKDKGNSRKEGDDAGAGSGGQEGGDQDAEGDAAKSSPQATVAH  
 Tb LAIRAPTRD--MVDQSVSYEFTCNALYVGIORKKVEKKQANVSAGEREGFVEE-----  
 Lm LSIRAPAPG--SVNHDEGYEFCAYDLVAIRQRQ--LPPPKTEAEELVDDTAAT-----

871

Tt -----NKNEKKEEVEWDPE SIMNVCYYDYS  
 Im -----NKNEKKEEVEWEPDSIMNACYDYS  
 Pt -----LKDDKMPDVEWDPASIMNVVYGD--  
 Hs -----GEDGEKEFQEEEEEK--EEEEEEEEPLPEIFIPSTPSPILCGFYSEPG--  
 Rn -----EALGEQEIQEEEEEAEEEEEEEEPLPEIFTPPTPSPILCGFYSVPG--  
 Dr -----PDASEELOEEEEEEEEPLPYITPSPSPILLCGFYCAAG--  
 Gg -----KEVEEEEEEEEEPELPSIYIPEEPSILCGFYSAPG--  
 Cc -----PGIDIDEEAFLMDS EEPVLPPEIYIPKIPNRVLMVNYTPSG--  
 Da -----PGIDVDEETFL EEEVPELQLP ELYVPREPNVQININYTNAG--  
 Tc -----PGLDIDEEVFLADSETEEELEPLYIPEIPNRVIWMQSTQDD--  
 Cr -----GEGGSKEGGEEGRAEEEEEEEEADDEADGGAGGSPSTTGELISLTLPANEPG--  
 Vc YYSPPRKCTRIRCORIP SACSLKGWEPVWRVWSAAQGDDEGAEG--GGDEEEEGDVEEDEEGNDDLAASSAELLTIALAPDDPA  
 Tb -----EEEEEYLGPPVRLICPMADG--  
 Lm -----ALEEEDVGPWPIAFVVQLPGE--

958

Tt TKILATVQGKFLGHIYIIDWN-----KDRPIDSLPIAKIPTVMNFVD--DDILLISFKDGSWOLRHKN--  
 Im TKILATVSGKYMGCYIIDLWN-----KDRPIEAIPVKIQSLCMNFVDF--QDILLIGFKDGSWOLRHKN--  
 Pt -KVFCTAEGKYLGCYIIDLN-----KDRPVEMIPISKMOTYHLDYKD--DVLITIGYKNGOWDIRHKT--  
 Hs -KFWVSLGGYDSGFLYHCEFPCCDES-----SDFKEOKDEPIDVRYLADTEDNPIOTITFNINKVMMFCGMKNGAIRVYVLNO  
 Rn -KFWVSLGNYDSGFLYHCOFPPHLVK-----DDFQKLENEPFDRLILENTDDNPIRTITIFSSNYTMMFCGMKNGAIRTYFLSE  
 Dr -EFWLSMGGFDSGFLYRCOFSEDO-----LDPAERRDEPLSFIPOVDS E LNPITSI SFSSSGQLLVCGMQDGSIRVYPAQD  
 Gg -KFWVSLGGYDSGFLYHCAFSSNEHQ-----EDPENRODEPFEVIPIEGTDDNPIHOISFCNSRLLMFCGMONGALRVYPLQD  
 Cc -TIWLSMGSF DAGYIYEYDPL-----PGYINRKPTKSTMYAADTEINSLCYFKNRKYLFLGMEHGEIRICRVNP  
 Da -SVWLSVGGYDAGYIYEYPSITGDDD-----EESVREAEPLRATPLRDAEDLELKC SLYSHK--DSLIFLGL EHGQLRICRVDP  
 Tc -VLWLSMGGYDAGYIYEYK-----IEOKSDVPYFFKMVDEADDETEISSFVYNYNRKYLIFAMENGEIRVKNKID  
 Cr -ALLVTAGG--VGHAARKAW-----RVRMGEPLAAPLLEGFASAPVTCLAHAGPE--GRLALLGSGDGLVRLQALEE  
 Vc -TLLVTAGG--SGHAARKVW-----RVKLGEALATPLLEGFTSAPVTFFGYS--AD--GNTVLLGSGDGLVRVQPLDG  
 Tb -DFAIGAGGV ELLYKYLHVRYEGOKELPPLPPTGIEPPDYVEEPLMNL CYRDYTP EASSMSYS--GRYLVICEGSOMLLROLDE  
 Lm -GFAIGMGKEELAYVYQGSIRYANQLELPLPPTGVEPPDYVEDPALNVCYRDCVPRRAFVSPN--G--ALVVCADRNRLLREATS

1045

Tt -----DLKINMLVRTHDRDTGAIKKVVNMHEKCKVMSVGN DGTFLFIYKIDLPSIKKITRGEIIEDF--QFEFVGG--LGEHSFAEQ  
 Im -----DIKIGVHLRPHDIDYGA VKNVCLNFMKNCILSVGGDGTFTYKVDMEAIKQICKGNMVENFIFADQFEGGSI SENTFSEK  
 Pt -----DFSKOINKQSHMDYGRVRKVLTFDRIGVLSVSDDGT FVYKIDFONFLMOLSGNEVADFQYPEFTMG--INSGTFAEE  
 Hs NDP--SLTSLVDYWHFMNDNNGCIKSIANSFDDRFLVTAGADGNI FVNFIFSEFMLRDKMK-----AKVPSPR  
 Rn NDP--FLISLDYWHFNVDNNGYGVKSIFPSFDDQYLVTAGEDGNIFVDFIFSEFIIQEKAK-----AHVPSPR  
 Dr L---HOGSLQAFWALSVDHNSGRVRHVHFSFDDTFVLSAGDDGNIFSFSCMTEOOIHTH-----ATVPSPR  
 Gg KDL--SVNTLKAYWSLSVDHNDYQIRGICCSYDDRFLITCGDGNIFTFNLSPEDEVHEELK-----AKIPPPR  
 Cc EDH---IDFSDYWILSMHDNNGYIPKILLSHDQKMLLTCGHGDNLF SFLIN--DDTPPLT-----FHIPRAKE  
 Da EDY---TNFSDYLSYPAHDYRGMNKILLSQDEKYLFTCGCDGNIFSFVSGEDRVSVKI-----EFENDRN  
 Tc GDY---HDFSYSWALHNDNNGFVPMCFSYDEKFFFTCGHDGNVFSYTFVQPD DDDYIPPE-----DYPIVE  
 Cr PFGSAAPGALPLWEAPLHDMQSGRVSGLGLSHDGAYLVTAADGALHLLALALPPELAPPT-----TOPGDEPLP  
 Vc PYG---APMGPCWESPLHDMOTGRVTAVALSYD GAYLLSAGRDSVHLLALOLF GAVEPOEP-----PAEDL  
 Tb MG---RVRLEPILVASAHRDLDGPIAAACTSFDDKMLVSVGSDGLVVAQLLDGCIAPPPSP-----VAO  
 Lm -----ROOVFLLGAADSTGGAVTGAFLSHNGSMVVSIGTDGLVVTQLRDGCATPRASPP--LIDAATVVEPALGMVSATAAAP

1132

Tt IELSDN--EENEIKDDSVYSIQEAKLLAEEDFKRNEAQKKKDKVKEVIKDLVROFEOLKQONSTIDEVARLTDQEMTVDFHEIEMLNK  
 Im IIEEENQEEEDILDDNVYSIQEAKLLAEEDYKQAEANKKKNKILEOVONLVSLFEDQKRKNLEIDEIARLTNOELCVDPDYIEMLNQ  
 Pt IAFEV---QDILDDTIYSIQOAKLLAEEDNRRNEANKKKT VKSRILOLREOF SOVRKNOTAEDA AKL TEDEL CVDPEYKOMLLD  
 Hs FGIETEP IPEDIEDPKAYS IENARRKREHDKLMKEVGEIKARKQEKALRSEFCNLL EMNEKLPKHMQFKRTDFDVDSQIRAEHR  
 Rn YGIEAEVADIEDDPKAYS IENARRKREHDKLMKKEV ELKAKROQIKILRNEFWKLLALNKEKLPKHMQFHRTEFNIDAKIHAIEHK  
 Dr AGLEKAVQDIEDPKAYS IETAKOKLELERVCAEAERKQORRARELLEORSFQELLENORLP OHTLRSEFELDPLFLOOLEM  
 Gg RGLEKEKA AEDIEDPNACNIEEVKOKREYERIMKEAERKSKKREELIALROQFLFLLOKNQELPKHMRLQREQYEMDRRVFEELNM  
 Cc PLLLPNVNVEDIEEPDYP SLEEVIVKAEYNRIMTVAKHKKDR TLDVLR ELAE EFGRIME SNRYLVKSOQIPOEEFELDPRIT EDLNE  
 Da ARPARKKDVEDIRDVNYPSLEQVLIITTESNRIMSLTKNRRDDVYLLRNFTKDYOGIMERNROLIKSQOIPP SDFKLD DRIVEDLNS  
 Tc ERTSFPNSV PDEANYDKLSLEQASLKKEQDRIDRLAAKHREIYREKLRKLRERFFKLLKRNKLLPSQMI PVEDLEVDRKRVTDYLDY  
 Cr GPAAALRPDPDLAAAYTLEEEKQOAE RDOOVREAEKLLSVORLGLIRAEFEALLAENAEALRLPRADLEVPGLRALME  
 Vc PDARLLLALTDITSPTAYTLEEEKQOAE RDOOVREAEKLLSVORLGLIRAEFEALLAENAEALRLPRADLEVPGLRALME  
 Tb LQPLRAEEI VEPOLAP--FSITEQKDLDDRRRAEDEKREELNLFDLKLDVHOKYARLLRENQSLALTHRLSKEEITIHPOIYRELQE  
 Lm AVVACAEEAVGAVEAPALSVQEQEADDAARASTEREAKLQRFNLRLEKVRDSYAELVHANEQLPSGQRNLNKDEMQLDASLQDALDA

1219

Tt RVEEDLEETKEELKWDAAEYCKLTKKLTNYVKNELIMDTFSVKAIKKSNVIVSTFKVKKMSEFMKQNLLEIFEVIEEEERKNOEEARO  
Im RVEODLEETKLELKWDAEYQYQKTKLQKLFKYMDELIVDTFTVKAIKNPNIOVSTFKVKKMSDFLRONLQEIQEKIDQI-EEERRIQE  
Pt RVAEDVEETRLELEWDRTLAKMKADKLLKAYMIDELEIDKFMVKGFRN-QASVQTFKVKKLSNLFIEQLKETYRLIEEERKNOENOPQ  
Hs KTAFLKIQVEKELAWEKKEKHELGLMKLKNRFRDPLESDTIVVHAILSDHKISSYRLVQPSKYSKFKRASQSERKPSKLDRFKEKEG--  
Rn KTSIKIEQVEKELAWEKQYELGLKVKVDRFREPLESDTVVYAIQSDHQIASYRLVQPSKYSKLRPSQTDRRRPSKMERFEKEG--  
Dr QTEORVQEVRRRELAWGEEERIGLSKLQNMFWESVVDTLTVFACRSGHKISSYRLLALPFTHTHL-----SSQSSPEEAELROE  
Gg OTAORIQLVEKELAWEHKHLJGLQKLNWFRDSLEFDTVIVHAIQSNHQISTYRLVAISEKYQDK-----ERPSWKKTVLKRAWK  
Cc QLKAEMLNVHKKLAFKVEKSKLGLKLLMDHFIEPITCLPFVARRILKPDTMVNSLRERKLGDEFATLDEVTRRIE---DREKAG-R  
Da QLKCEMDLIDORMAFKIERNQLILRKLMDHFVLPITCLPFVARSISKPETMIHVSVEKKLSENFOAEYADVLOKLSRAKDSEK-S-T  
Tc KLEEEQALVKKRLAFDVQKSELRMNKLRYFIDNLCFIPLIVSGLR-SERLVRMLRQRKVSPLNDOMLOIVDEKILEEVEKGRPP-E  
Cr EALRREEVARLELAWESERORLGLAKLRRYFLDGLSERVVLHSLRGSSTVTTFRVAKLSDETRAELAAMRQAARAAAAASAAGG  
Vc EALRREEVARLELAWESERORLGLAKLRSYFLDGVETERVALYSLRNGSIVTTFRVAKLSEETRAELAALRTAAAAASAAGGSGDG  
Tb EMRORVEESRKPTALELARENIRTRKMRNRFVDNLADHDFLVRFSKFEFSVAFRTPYVDGSIKLFQOOIDELLGSERCSSLACDGD  
Lm EKORRVREAEKEYILPTAREDVKTTLKLNCFDNLLYDRFELAAIEEGFSVASLRVDFPHESIACLEAAAHQLAESDGEDSVEKEED

1306

Tt NAMSONLNQTNFGGDOTISNKGMOETVKKDOTLQKQEDDKLKKTVMPNMGGQQG--DKKGETTHLSASKQEKLENKLEKQKIRQEM  
Im EIFOKSPONNLLNDOTIKNOTFKKEVONLONTGN-----EKKGEQTHFSLSKQEKLENKLEKQKIRKIKEL  
Pt IENKTOEKIQVOSQVKITAVDMKEDQOKATIOQMDPDOK-----VPOAKLERERLQEEERIKKEQ  
Hs -PGRKDSORDAGGSVTIQEESIIEKGGKFRPKTLSEIIVENQ-----IEKTRKILKAERAOLKIQQRKKEW  
Rn -PGKRESORDTGGSLQEEVVEKGGKARPRTLSEIMVENQ-----IEKTRKLVQQAERAOLKILORKREW  
Dr HTHPHKHSSTSLQDEGPVSSAGTHTHT-----OKQSSRAAEKVERAREQIOTRROO  
Gg KKEKRESIRDRKPRVVKREADKLTIVRKPPTICFIERK-----REQIRRLVEKSDKEKAKIMKRKEEW  
Cc MVEVKSLOEE-----EEDEEKOKVOGIESFLKGLSPSTIOYRL-----GVKINHMLRKYRSRKARMEERYNEW  
Da MADESDDQGGGAGKGDQEEKLIKIDGVASFLQDNFFSDEEKL-----TAEMKQMLRRYNDKKLQIERSKEW  
Tc RAPPAPKTIQ-----PKKVKEQGLEFLVNLDPKILLESOK-----HNKLTLLNKYRDRKLLKWERREEEW  
Cr GGAGGRDITDARGKGSDTGGGPGDAAAARLAEATAALEEG-----TASGKLNKADLRRLLARKRREAEW  
Vc IGRDGMNSDAR-KGSDTGNPAGDAAAARLAEATAALEEG-----TASGKLNKADLRRLLSRKRREAEW  
Tb RGIYSVASGEASQSPRNLSLSTAAGVVRWLNSEERKRNEGEOOKMNA-----HREAEILTTTMRQYLNKMDEREERHWRKKGY  
Lm EGSDEQDAGADVAATEHTAAGDSKAAGIDAAATTAYERPDDLIGIA-----TIGASVKQQLNKMDTRRRERQERRDGY

1393

Tt EELEKKKPTKESFEPDHLRDINHAMEITLGDYKLSSTPTYNVPEENORMNES-KKKKHMFLLEDEFIYNTKMKFNNEIVSLRERKTSLID  
Im EELSKKKPTKESFDPDHQKDIENAKKTLGDYKLSSTPTYDVPENORMNVS-KKKR-MFLREEFIYNMKIKMNEIIALRERKKNILE  
Pt ELLEKSKP-IELAKPENAPDIOEAIKOYGDYKLSSTPNYEPDNORMNVS-KKKRHMVMLEEFTYNTKLFNQQLLNKRRKVNLI  
Hs EELYKSKPGDDYEDPKDLQAIKEAQMVDGDFNLKTPADYKIP-EHMRINAAKKEEELGHLDSLHGNKRHMNKCILSLRDLKVAVVE  
Rn EELYKSKPDDYEDPRDVOAIEAQTFMGDFNLKTASDYKIP-EHMRINAAKKEEELGLLDTMAHGKKRYMNCILSLRDLKLAVIE  
Dr AELYASKPSEYEDPDVEGIRAARENLDCKLKSADFTVP-EHLRMNVEKKRAQLLELERKIFEQKSEMNLRVLALRDQKVALLS  
Gg EKLYASKPSSDDYEDPRDVOAIEKEVENMGCYKLLKATDYRVP-OEKYMNTEKKTMLASLEVLIIKVVNMNKOIMSLRDFKVSIEE  
Cc KVMNASKPDPVSNHPDDVLAIEEAKETIGNYKLLISPDFNMP-KGKRENTLTKYKQFLNSRKAHMLREDFNSKLEVRSKKVALFN  
Da KIMHASKPDPNSDHPDDIRNVEIARKTIGDYKLLISSYDFMGEQERETTLISKYQLLDCRKKCHYLRSEFNDRLRFMRACKLSLKS  
Tc EEFLARKPLPGVNHPPDDVALDKAKVTIGNYKLLSDITYKAS-KNORETTVKKYKELLRSRVKOSNTRHNFNEKVVWALREEKIAIRD  
Cr AAFNGTRPDDTYDSPADLAAIEEARTIGDFKLSDPNYVVP-EEERLTPQRKRLAMLEEEALHDIAAAAFNAKFFALRDVKKRVL  
Vc AAFNATRPDDTYDSPADLKAIELA-----  
Tb EMLLAHKPDPAVEEASLNEELRRETRRRGECILRTDPSY-----HSAPSAVIKLOOLIRLEEIIFNMRNNFSNELLKLRDEKERLCG  
Lm GRLLDRKPNPAIDDAALKQOIAMD LKNRGDCTFRIDAAYRGE-HQYRPTAVAKLQRMHLMEDIVRIKTAFNEDLLQLEEKRHTLA

1480

Tt KISNYNKR-ITEINKQLGINETLFTLTDKQLEAVD-QFDVTEEQIDQYEQOKNKETAQOSKKGGAQEKTOOOOOSSEKQDDKEKD-  
Im KINDYNOK-IOEINKQLNINETLFQPKIDKOLEMPETFFQVTEEQIDAFIISKKNENAQNAKNTQENEQQNNNNNNNNQQ-----  
Pt KVKKYNOQ-IKKINEOLGKQEOLOFOPEIDKELEDPHSFMEISDEQINEFISKLOOQQOKKDEOKRIA-----  
Hs EIQCIVQE-LKNIQSTLHISKHPIPKIPQIHP-EEVPEKRFQYDEETLLNFQOQMKSKDEKSPGV-----  
Rn EIQCIVQE-LKTIQSSIPPAAKHTIPOVPOIYP-EEVPERRFQYDEETLLNFQOQMKSKDEKSPGV-----  
Dr ELOAOVEQ-LOAVOOTLPLOKHRPLPALVLLP-AEVPERRHRYTRATLERFNTLRLOEEODILELLEA-----  
Gg EIRCLLOE-LKSVOAALDISERLPLPLIPQLHP-DEVPEKRFQYDRDILLKFKEEQAAKAKLQEQLEES-----  
Cc EVIELVMK-LKEIHSEIPEERTKPLPIPIDQNIFFPEKNLELEKYTSMAERVKEAKRKKKSFIAEIVVSP-----  
Da EIESSVEKKLNIAHAIKPHYIREMPERMAIDASLEFPENNLKLEKYSMGEKVKEAROKOSIIDEIMOAA-----  
Tc ELOVLNEK-LDEIHKEIPDKCRKEAPVREPED-CEFPERHFEITVTVMEEEEVEYDEGRKPEVIVTESKDF-----  
Cr DVRVKLAALAEALAAAAGAAATGGADPDATAAAYLAPFSGLPGLPEEPFAEAREAVTDADLAFAARKAEDE-----  
Vc ---VMANSAAGGGTGVAVAGGSVDTDATAVMYLAPFASIPAALLPDEQPAEARDAVTDDDLAFAARKOEEE-----  
Tb TLNVSQRIRAINKEL-KDKSFHADDVKLTPEEMPGRFEISRDLGVAFMKOROEKLEOTAKKAQORGFADLATGEPATNTDTSG  
Lm RLNCMRQDYRKVLFQGLCTSPVDPDLSLTVEEPEPTLYTMDRDLKLEAYNKQKTEERAKAE-AMKAHRGFGADLAS-----

1567

Tt -----GKKEKKVDITAGFKPRKGAKVQSGSELEDELKSI  
Im -----KKEKKPDPTLGYKQKRGVQVNSEQEEELKTI  
Pt -----PAQISKPAEQ-----NOIKTRKGRVQOSGLEEEMKTI  
Hs -----EQTSGGGVGG---FLKLSRKGDLTTRDSISRSSKASTFSLDIPKCLEFEKAEPDVELEIMKR  
Rn -----KQSGSGASTGGGLGFLKLSGKEGDLTTRDSISRSSKAFAP-LLEPKATEFEKAEPDVELEIMKR  
Dr -----ODTHTEEDTHTOSQDTHAVEDTHSQEELTLLEEQMREM  
Gg -----PSSGAFR-----YSLKSSDKETGSLQQTASSDGMKRSSSVVIEQKIFVIEKAEPTEMELEILKR  
Cc -----NDEEYEVLLFDEKSIYIGDDDMOSTVASVVPETKYSVTNAISGDVLOTLNSMDHIETPCEREMKRA  
Da -----LDDEFKTIILPDESLEFYYSDLLPTSLNIKEKKRIKOVDAIPNHVQKMMQDYDRKITPWEREMKAV  
Tc -----DAIEKHVLPKN-----TKKFDAKECDVALLDFESLCSFSKNEKKDITLWEHDIRTR  
Cr RKAASAAAAGLGGFAGAAAGPKPAAGGAAPAGGALAGGAAGSGVAHGAGGPPAGGQGLTAAEALAKMMAAVPOSELEKGLAA  
Vc RKAASAAAAGLGGFA-TAGGVKRTAGGVVAPQPHGGAGGGGAATSGSISGGP-----GLSASEEALAKMMAAVPOSELEKGLAA  
Tb ADTPATRRSEGEDSRKVTISANRDSFGTAAARTSVRTGTLAASKGRPFSGGGFAAGAARERMNHELVRKHENIKLTEMEEELQI  
Lm AQAPERSR-----DSSTVTTGTVPGSVIMPQKRSK-----GSHFPSYLGSGRSQAVGSLAMRERMDADLKGKLNNTLTPENEEREM

1654

Tt NQMILNAEKKRMLDEINEEIEFFDKOVNCONKCKIESDMTIAQMKFVTTYQELLILADMEEQDEKYIKDLLNHKREKADLEEQSS
Im TOMILNAEKKRMODEINEETEFOFDKDVLLKWNKKNIMESDITIAQMKLVTFQELLILADMEEQDEKLINDLLNLQKDKSELEEON
Pt QDMVLNAEKQRMIDEMOEEIVOFDKDVVKCONKKNVLESDMLIAQMKLVTTYQELIILEDMEDFDNKLIKEVLDKFKKQONLEQO
Hs DEIKHVMYQQYLVNRIKELVVTFAELRLLRHOKLKLDTQMKLSDLHHVTLFQELILLKNFEKQENILQERVNSLDKEEQYMQWKN
Rn DEVKHLMOOFLCNRIKELVTVFAELHLLRHOKLKLDTQMKLSDLHHVTLFQEMLLLNKFNKQENILQERVNSLDREEQDMQWKIN
Dr EEARGLNLOEQOLLTOMQDSVCRFDAELCVLRHEKQQLDVSLLKLADLRHVTLFEEELLLRDFQKREEKLTERRTYRQEEEDDIQGRMR
Gg EKIKNLYLOETLINKINELVTNFAELRFLRHKKLQLDVOMKYADLNITWFEEELLILKNAEKNNLQGHVNTLOSEQEAMQSKLN
Cc RVMRKIYEQDSILRHIHESYELLDNQLDELEERLEIVAESVYMDLYMLTLHQELIILKEFEAMENTLEEKVNKLERATAKQKMQ
Da RLSRKLYEQDCI IKDIESRYEDIDRELEDELESMRLQVYADGVYSDLYKLTLHQELIVLRDSERTENSRLKLNKLDKAVALDKLQ
Tc RLRKLFQEQDVIIDEMNRKITDFDDKVEKLNTERFOAEVDAKIIDIFMVTVHQELLILKEFEALEYTLQSKVNOQKMSVLDMRDID
Cr NRRRVEHMRSKLSEIITAMLDAFDDAHSALKAELGLEADVKGOMRLLVGLQELQLLREFDKRESVLLAKROAKLDDKQEIIVDKIA
Vc NRRRVEHMRNKLTDENVSMIEAFDDAHAALKAELGLEADVKGEMRLLVMLQELQLLREFDKRESVLLQKROAKLDDKQEIIVDKIT
Tb ERNRLLAERORLHTQVQAMMDEFDVRLSMYEERSRVDANLCLAHTHSLLLFRYNNILLVFRQKDFELLOSSYDEARNSRDRCLREME
Lm ORAVLERDMRRLKAAMAARTEFNDKLGSLRLRRAALDVLCLMTRCLTLFHREYQLLLIFRSQDKKLRAVLTAVKQERESVORGIA

1741

Tt KIVGELTALANKDSONEKELTEOMKVFVKELVYPEDDNKREKIHQYLYLRKYKKNKAKOLK-LRNHEE-ENEDFDEDEMSSEDDDDDDDF
Im KIVADLVTLANKDSONEKELVEOKAFKELIHPDDDVKREKIHQYLYLRKYKKNKAKOOK-LRNAAE-ENEDFEEDIESEDDDDDDDF
Pt KILENLATLOKKEQONDKDLIEQLKAWKELVHPDDEQKRNIHDYRKKFKREMLKRLKQOKEKHSDEENEDDEENEDDNDDDIV
Hs ETLKEMEKKNEITKLOEQEKALYAGFOAAIGENNFANFLMKVLKKIKRKKKVEVEGDADEDE--ESESSEEE--SSLESEDES
Rn ETLKEMEKKNEINKLOEQEKSLYSGFOSALGENNFANFLMKVLKKIKRKKKVEVE-EADEDE--ESESSEEE--SSLESEDES
Dr ECOROMELKRDRVORLQNRKESISTSFQTSIGENNFEEFLTRVFKKIRRTKKEHTHAQGDQSEDEDESDESDSDAEDDED
Gg SYLARMEDKSEIIVKLOEKEKALYASFOASLGENNFHFLTKVLKFKKNCVKKK-VERETDEKD--ESESSEEE--SSSEDEEDS
Cc AMNIKIEOKIREIAKIOEKIKDVFSEYMSMINEN-RFYEFLLRIFKVKYKPK---PKTDDESSASS--SSTTESSTDDDEAG--SIDSR
Da SMRNIDKKNRDIKNIQNKMKETAYFASATQDN-KYAKFLTRIFKVKVIGVAQRSESSSQMSS--DSSDETSTDQDSDNSSVDIH
Tc EISSKIVEHNSDIEKAQEKISITVSTNAVQDN-KFFDFLRKVFRRKYPKPKVHKDDGETESSSESSSSSTSSSTESDDDGKSIDSR
Cr ECTDKLETKRLELEGLVARRAAVVAELDAVVPESDPFR-----EALVRVFHRRIKRSKKKAGGGGGEDDYDSEDEDEDEMGGDE
Vc ECTDKLEOKRVELEGLIARRAAVIAELDAILPETDPFR-----EPLVRFHRRIKRSKKKAGG--GDDYDSDDEDEDEMGGDE
Tb ECLORLVODOTASIEKLOEQANKVFRREVEIFISNSFPAEH-----VPYITKVFRLQIKRRKHHSDMSGNDDDDITSDDDDDDDD-MGEDE
Lm SQHTDLASSEERIRQLTGOLKSTNQAAEAYIDEHCPSPDK-----LTYIKRVYYRQLKRRRRAEDGDDDDDDITSDDDDDEDGIG--

1828

Tt MDDDD---DEKPDITPVENDT-KIREII---DKICLEDQOETNRKEKADLEROKNOISVKIOSTLKELOKAEKLRAYOREKLOK-
Im LDDDE---DEKPDISPVENDS-KIREII---DKICELEDQOENRKEKSELDRQKVSILSKIANIGNNLRKAEELKNYQRKNFKKL
Pt SDDDE---EEKPDISPVEQDE-KVRDVI---EKICGLEEQDNFKQEKIQNEQOKSKLANKIAQNDIYLKRANDDLTOYQRKQLOR-
Hs ESEDE---VFDDSI CPTNCDVALFELALHLREKRLDIEEALVEEKKIVDNLKKEYDITLSKVKVIVATNLNAAEEALEAYOREKOR-
Rn GSEDE---VFDDSI CPSNCDVSLFELALQLREKRLDIEEALVEEKKVVDNLKKEYDTISKVKVIVATNLNAAEEALEAYOREKOR-
Dr YEESEAGAALDDTVCPNCDAAFENTLRLRDLRVDFVEEQLODOMKTLDTLKKDYDTLSKKEKLVQGSRRSADSDLELLNREKQOR-
Gg GSEDE---IFDISVCPENCDAKLFONTIQLREKLLDIKDALIREKKAALKRKEYNVLFKAKSIEASLNTAEKELDIFOWKKOK-
Cc EIGPI---HVDENICPLGCDKELYAMAFSMRERRYEYLOKVEEKSIELLRKEIENDTKMKKAIENNLKYNQDELEAFMKORK-
Da KIALT---VFDESVCPPDCSRELYDLAFSMRLRKHNDENEIRREEQKNVSLLEVDHDSKKIKIETAVNDCKQTLNFMHEKQCR-
Tc DFGII---KODLNVCPKGCPSVYEYTINSRSEHVEELLIKEVLMKIEVLKDDLEIHNKVKVIEKDLQCODELEKYOROKQDK-
Cr VDDDD---DGGEVCPGCDQSVYERVCDLREKRLDEEDMIAEFTKTIIEVLRKEKEALAKKQRLVEQGLAAVNADMAEFQKEKQGR-
Vc ADDDD---DGGEVCPAGCDQSVYERVCDLREKRLDEEDMIAEFOKTIIEVLRKEKEALAKKQRLVEQGLAAVNADMAEFQKEKQGR-
Tb AW-----EEICPPNCSSEERWCEVIEKREVRDLYVDAITEEROLEATEORIEEHKALADKNNAAVSTCLKAIEDFOGEKRRK-
Lm -----EEARPPNCSVEAWEGMLRCRESRLDLTEASDAAKAEVANIRKQLEQSEORLQELAEHVKQCRGEVQVLEEKRRKE-

1915

Tt VNQLDVSFC-LQVDQIKNLIEMGNOQQ-HILPEDLK--KSILFTQNERNKLRLRQEQEKEIEQSKKTLEKRKRYLQIKINKKN
Im INQMSLIEQLNIFOSIYIFIKLQEKKESYKLPDDL--RSILFTQDEFNKIAKRIKELKLEQERIKKSRANLEKKQKVLQVKLSKKN
Pt VNQLDVSFV-LKLSQVONLNEQ-----KOLPADLN--KSILFTYDFFKLCKRVVELKHEQGITKOKAKDKTKMKQEKELKLD
Hs LNELLVVIP-LKLHQIEYVVFV-----EIPSDLS--GTLVFSNHALRLQERIHLEQENSKQKLNKWEERRRKLIREKREMT
Rn LNELLVVIP-LKLHQIEYVVFV-----EIPSDLS--GTLVFSNHSLDRLQERIVOLQEENAKQKLNKWEERRRKLIREKREMA
Dr LNEVDVVP-LRLHQIEYVVFV-----LOPADLQ--SALVLSAVELORLQMRIRELOEKSOORLOYRHARQOHRQOLTPOLTDME
Gg LNDLYVVVP-LKLHQIEYVVFV-----EIPRDFS--QALVFTNQSLEYLQKRIVDLHHEKIMOREIYKKAQKQYKQLVRDCKEME
Cc LNDIDITVI-LKFHQLQHFVGS-----STVAQIQ--DCTVFDKEKLSHLYARVEELOKETSDQAKHKKNRMHLMRNVDCXHME
Da LNDIDMTL-LNFHQIEYVVFV-----DNLKSMF--NCVVFDTTRLSQLYRRVGLQOETCEQKMRHKKNTHLHRMNTDCRYMN
Tc LNEVRTTIV-LRLDMKHFAAE-----YKTSGIM--DTLIFSKEKRLSYLKRVEELOIETEHQVSRHRLNVKHYRMTQDCKYMA
Cr LNQVEVIVA-LRMHQIEYLLDG-----CLPDDL--ACLVFSASQLRRLQARVDELEEEKAGLRAAHKELRRQHAALLRDADKE
Vc LNQVEVVVS-LKMHQIEYLLDG-----CLPDDL--AALVFSATQLRRLORRVDELEDEKAALRSOHKDLKREOAGLLRDKAEKE
Tb LNMLETIVA-MRCGOVRCLDEEG-----RCPDTRFRNDLVVSDKVIITGLHDIRALAEKHDRRGKLSMVAEQOALQERSEKO
Lm LNMLYTAVP-LRLSQVRCLEENA-----RIPSHLPEQPVVVISAEQMSALRQIFDLADQKIQRREVARLTAELQPLKEARAASN

2002

Tt ALIDELSKKYNEKHMLKFGDIIDLKILDALEPTKO-----VLEMREFKKEEETSILRVEKAKQMLQEKKNVLLQ
Im AEAEQSEKREKHFLLKFGDVMDLSTIEOLEPTKO-----VLEMRERFKEEEROSI IKLERAKOOLQERKNYMLQ
Pt LKIEDLNKKYEEKHMLKFGDIIDLKILDALEPTKA-----VLDMRAOFNQEKEAQRKVSRAKEELSKVKOOLLE
Hs KTIHKMEETVROLMISKFGRVVNLEALQTLVNTT-----LEELKIRKLRKELANAKEMKMWEEKIAQMRWELMM
Rn KTIHKMEETVRELMIKSKFGRVIDLEALQTLVNTT-----LEELKIKLRKELANAKEMKMWEEKIAQMRWELMM
Dr TRIRESVRCEQLMLLKFGLKLVLELVLQTLVGNRK-----VEEMRQEVRRDARYTOELKHWHQAEVVKACAVTA
Gg ITIQORLEEKCSQMLMLKFGVVDFAVQARLVNIR-----LEELEQIMEKEYEHSQEIKECAKRIILDLEQKLM
Cc LEIKKLDKNIKEEMMKFGQEISLNALYEAVALRRM-----VYDIKVNINGMISSFEKEINSVKEAYAERVNILEN
Da SQIKRLKSCVFEEMLKFGCPI SLASLYEAVALRRM-----IYSMKANMTDNLK-YERQFKCLKERYDENILILEN
Tc TRIKYLQEVITDKMKMKFGKVIDINEIEVAMKSRTFGRDDLHDLLEEVLLKIVHDLRLSMMDIKGLYIDQLHFWEKEISQTKELTY
Cr ARVAELEARAHDVOMLKFGQVIDLELLDRVSSSRG-----TEELREDLKKQELAYARELAEWDSKIANARMDELVV
Vc KKVAELEARAHDVOMLKFGQVIDLELLDRVSSSRG-----TEDLKEELRQELAYARELAEWDSKIANARMDELVV
Tb ALHTQWEEKIYEAMLLKFGQIVNLEVLESSCGSRE-----VEQLKERLRLEELSWEKELRKRDKKIAVLRKELHE
Lm RVFEWQEKVNEVMLLRFQYVDLEMLES CGSSWA-----IETKKEELLHLELKWARSVKKVENQITELRTRLOD

2089

Tt AKKENTSIIITSITKLGODLMKLSKKLDSTNKQLFKEDNEDKKNKQDLEKERQNYKDLVRFLSKEIEDLKTEIGLFKRKGGHIYTMVT  
 Im AKKENTAIITSITKLGHELMKLSKKLDLTGKQLFQEDNEEKKNKQDLEQEROQYKDLVRFLLAKEIEDLKTEIGLFKRKGGHIYTMVT  
 Pt VKRENTKIFTNITKLGKQOQMDLSKKLTSGNKQLFKG--DNKEKRSDMESDRQSLLEDLVKFLGKEIEDLKNEIGLYKKKGGHIYTSIT  
 Hs KTKEHTKRLYQMNDLCEKKKRLDSRLNLTQNOQGNFAFG--PREADV--AREEVTELIQLOAERISALKEEIALLRKGGSLILPPIQ  
 Rn KTKEHTKRLYQMNDLCEKKKRLDSRLNLTQNOQGNFAFG--PRKADIV--AKQKVTQLVQTOSEKISALKEEIALLRKGGSLILPPIQ  
 Dr VMKLNTERLQKINRLMTOKKTLDDEELDCRQRTVCQYAG---GLVDEQ--ELQRLQQLISGQSQDIAALNVEIQALSRLKDGHLPPLE  
 Gg LTKENTRKARQLNQFCLEKQOQLETKLDSLKDDWGVFQFG--PRTADMK--EKARMSQLKRLAHDEAILREEINFLSRKDGHLIEOLS  
 Cc LIQDNTEKLNLLTVLEEEKSKLRKILKHVPMTEEEIELS---KLTQYON--DISKLSILKSOMHOKELFRNEIRNLSLKSRL--PPIC  
 Da LVRDNTEKLSVLTVLTEEQMRFHKI IKKWPETSKNIFQS---ELEWRK--DLAHLEGIIVNQKEQKEFFRSQVNRNLLKLRSL--PPVT  
 Tc VLRHNTSQOELLTYLVNEKVELAQSLMSQEKKKLHIASVGDITRRYSE--EIEKLAIISEONQOIQELKDEIKLLRTKGMVL--KPKE  
 Cr LTRNTACLNAVSELTAQRRLSGLTATRKGFLFADPVQQR--RAEVE--ERDALVALVNAQAQAEIDRLKQOLLALRRKDTSMYA---  
 Vc LTRNTACLNAVSELTAQRRLSGLTATRKGFLFADPVQQR--RAEVE--ERDALVALVNAQAQAEIDRLKQOLLALRRKDTSMYA---  
 Tb SLEYNTSLLQTIQDQESDRQSVERSLAOSTQKVVSKMYDSI--NVATEE--DRSNLRLIIAQAQEEIDALRTEVALLRTKGGHVYAAAM  
 Lm KVFENTSLLOQLGDLETERQRVDSVLSQATSKTVQQYCGTT--VASKQ--ERAVLRELIAQAQEEIDALTAIEILMLKRKGGHVYSQAM

2176

Tt SNKKNFN-----  
 Im SNKKNFN-----  
 Pt QTNQNFVOR-----  
 Hs SPREKEIQPADL-----  
 Rn PMOENEMRHMDA-----  
 Dr PVLRLPAHTHTASGTGAHSKLTLSSGRAVK-----  
 Gg LLTRNNQFLQPSSPDLEAPDQIFPVLKP-----  
 Cc SKKKSOKIRTEPHEDEOILAVIDIKTGDGYTIDKTOVKIKVDDVESNDYIEEEVELSDEEKEAEDDTKEREITDFSSSENTAMMIHR  
 Da SRRKYLPSIKKICSKSDDEQASVRDETWOEKKTAISEIFKDKIHDSALRIVRNLLSKIIQOYVEREEAKSIVDQFFNEISKKHSNI  
 Tc VKKEEPPEEPPVAWEHIKDWGEEIEEEEEESLRKPFSTEIVIPPTLQEKSQEVATELIQEMLEALDVKLTKRSNENFVKEILGSVMRG  
 Cr -----  
 Vc -----  
 Tb AAGR-----  
 Lm M-----

2263

Tt -----  
 Im -----  
 Pt -----  
 Hs -----  
 Rn -----  
 Dr -----  
 Gg -----  
 Cc LLSRIIEMSLGDQAEESTQOELNEVISNLPINGNHDDLEAGIERSVENIVAMLPOGNPERMEAMROAVRESLSDIIRLDSESKQI  
 Da STDFIDSFMEICEKIEKRIEEISTKAGISGKIRDIILEYANEIISOLEIESRGIGVGSVEISWNVVKPKLDEFLESMEIKKDITTEVY  
 Tc LSMTELVEELVRNLPLEPDDVQRGIIETTAEQLYVVOQEPDAEAEDKFFSCREILEDIVDEILLVKGEPHSVMARLITKLVEQLPIDF  
 Cr -----  
 Vc -----  
 Tb -----  
 Lm -----

2350

Tt -----  
 Im -----  
 Pt -----  
 Hs -----  
 Rn -----  
 Dr -----  
 Gg -----  
 Cc KSDDTDPDAKVKSKINELLENVGIETENMQIQNELVQLIKNGQGVDAVMEWLSDKLPVNMNEESKKTAEYAMVTLAEITEQIIMS  
 Da IMKFLKMEMGLELATDYVLTKLSTKPDSETAIAFREHASRTLREIQKHIDGESETETTAKSSNSGL-----  
 Tc LKEQSSLEYIVKRMVTSLELTKLNRSVMSLLRSKEAREILDEIQTVFDSSGLDLLYLIKDE-----  
 Cr -----  
 Vc -----  
 Tb -----  
 Lm -----

2437

Tt -----  
 Im -----  
 Pt -----  
 Hs -----  
 Rn -----  
 Dr -----  
 Gg -----  
 Cc EPVSVQAEEVEENIVSTENQSVKDDMSVD  
 Da -----  
 Tc -----  
 Cr -----  
 Vc -----  
 Tb -----  
 Lm -----
