# Supplementary material
Source: PubMed Central journal article supplement (PMC11105627)
Supplement: 18_2018_2819_MOESM8_ESM.pdf [file 18_2018_2819_MOESM8_ESM.pdf]

# FAP57

1

```

TtFAP57C  -----MIDKNDITGRLKLDLLHGFGLSLSKGYRNCISILDQENFRKVVVFLGOYLAVKQIDFQDMNFIKLDEKTES
Hs        -----MSAVVAQTLHVFGLRSHVANNIFYFDE-----QIIIFPSGNHCVKYNVDQKWQKFI PGSEKSSQG
Xt        -----MSVIVAQSHYIFGLRSPVTNNIFYFDE-----QTIIFPSGNNCVKYNVDQKWQKFI PGSEKSSQG
Dr        -----MATVAAPSHVFGFRAGVKNLLYLDE-----QTIIFPCGNNCVRYNIDQKFORFIPGTERSQG
Che       -----MSMAAIAPRLVFGFRGDVGDNVAYSDD-----GSVVYPAGHNVVLYSADTKTORIIPGTLESEGG
Tc        -----MPSPPAPPRMIDRRHVFVCEKVKDGFQYLDD-----TNVVVWVSGKSLVILD TQLGTQOLI SCTPTCOS
TtFAP57D  -----MAGLAQHIQLKYIFGMNNEIRNSLQFHDE-----DRIIYPAGYNVVLHDLNDKSOHYHQGTNEYRG
TtFAP57B  -----MOLPSIGNTOHIQLKFAFGINTNIKNNLYFLDE-----EKI IYPAGYNIVQYNIQDKTQVYYQGLTDYRG
TtFAP57A  MAOOIVOSLQDEGTQSLKLDLDFSMKYVLGYRSDFKNNIFQYTM-----NDQNR I IYPAGNTIVISNNE-NKQOFINCIPGKTG
Dm        MDEANKEDVKRASLSNSTVTIRPRLIYGLRSDVIGNIHFNLIT-----KEVIY PVEGVLAFHDYVQNKQRFRLLPEDTR-
  
```

82

```

TtFAP57C  IVSMAICTKKMVAAVCEKQYOODASEOQOODOHYQSKYSSQPR-----PFLAIYSLSDKKNQMVENRS
Hs        MLALSISPNNRYLAISETVQEKPAITIIYELSSI-----PCRRRK
Xt        MOALAI SPNNRYLAMSEKGLEKATVTIYDLASV-----PFKRRK
Dr        MHALAI STNNRYLAVSECR-EKATITVFDLEQE-----QNRRRK
Che       ITAICVSSNKKLLAVAERA EKAMITVYDLOTL-----KRRK
Tc        VTALAI SYNHRLLAVAESS-KFPCTIYIYVCDPS-----GNPKLRRKK
TtFAP57D  ISCLALSPLKRYLALGVKGQDPAT-----LIFDTFTQKRRK
TtFAP57B  ISCIELSP LRRWLA VGLKGA KFDNEKFDNPSIATYD-----TITQRKKH
TtFAP57A  ITCMTLSPSKRLLAWS EDCDSGIIVVFDL IKLDKLEKAKNQNYQEPSDKDKLDKQAEKDRRDRFEKEKREKIDKLOKEVKR
Dm        PEVISISSHRKLLAVVERHSKNGRYIS-----IYELATLKKRR
  
```

163

```

TtFAP57C  FIYDKDTQMSSFVALSFSS-----DGRYLACLTG-----HPEYKLI FLDLN
Hs        VLNNDFQVQKFI SMAFSP-----DSKYLLAOTS-----PPESNLVYWLWE
Xt        VLSAPDLTAHEFVSI AFSP-----DSKYLV AQSG-----FPEWQIIFWMWE
Dr        VLTGGEMVDFVCM AFSP-----DSKYLIGQAG-----GPDWTLFLWMWE
Che       VLIAADAGSKEYVSMCFSS-----DGKMLLAQGG-----GPEYNLVLVWWE
Tc        VLOVPLD LGSTEYISLGFSL-----DGRHLISLGG-----YPEWNLVYWNVE
TtFAP57D  NLGLNLGNLDRYNIKQWVSI AFPSQNOETKYIFSLSG-----AGGDVVL CWVWHE
TtFAP57B  IILNFKEVKIKYWVSLAFPSOQ-----EAKHLVSLSGNCLSERHKDKESKDRDSKEKQSSAQQGS DKEIEGEI IACYWNLSG
TtFAP57A  IITTLDCRSRHYVALDFNKI-----NEKRIVALSC-----APDWOLIYFOLD
Dm        HLELPSNHRNAEIQQMIFTN-----DSRSVALITR-----PPEETLIMLVLD
  
```

244

```

TtFAP57C  SNKREIEIASAFLEERL RDVPOKENELKINKISVSPKDSHOVALLGPEIFMIVRI-QESSFVPITQEI KRMPKKKDN-----
Hs        KQKVM AIVR-----IDTC-NNPVYQVSFSPQDNTQVCVTGNGMFKLLRF-AEGTLKQTS--FQGE P-----
Xt        KQKVMATVK-----PDSH-SNPIYQVSFSPQDNTQICTTGHG VFKLFRY-LEGNMKQTN--FOKVE P-----
Dr        KKKVMATVN-----ISN-NGPINQVSFNPDNSKICVSGKGVFKIFHY-AGETLQTN--AFK TDS-----
Che       KSKVA AVAK-----TTNQQGSP IYTCAFSPGDGTMVSIIGQGFKMFKL-VDGSLKLLNIALGKRDP-----
Tc        KARIMATCAVL DENE-----LGSRRRLLNOC SICPNDFSLVCVSGHGIVRFLL- RDNLRRASG-GLREPV-----
TtFAP57D  KGKCLGS-----IDLGAQNDIYEISFNHSDANSICVTGNFFGIYAK-IEGTVREDNQQQKPSVONGENSS
TtFAP57B  SGKILAWV-----QVSLANIDAFEISINKNDTSFFSCIGRKVFKCFKK-IDSVEEGDROADDKQKGEKQKGEKY
TtFAP57A  KOKTVIINOVP-----LKVGDNMRYTHCFHHPKEEDFIVAIGTGAIKPYKL GADGQFKOKDPPFVKKESKDQAH S--
Dm        KTSTVIEGRA-----TIPGSHGGAECIAGNPDCNFMVGGERTLLLSK-SERGF S I SNNLKVYRVTS-----
  
```

325

```

TtFAP57C  -----CIYTD AVWFDN-----DKIALSTSYGEIFIIQDSEVK
Hs        -----QNYLAHTWVAD-----DKIVVGTDTGKFLFESGDQR
Xt        -----ONFLCHTWLSE-----DRVICGTDNGLSLWESGDLR
Dr        -----HNFLCHTWMIT-----EQVLAGTETGQLMMFESGRLR
Che       -----ASVVSQYWVSPDPS ENKERLLLGTIDGEIIMMEGTDAR
Tc        -----TNYMAHIWIPSE-----NRLILSTENGLILMENNEYK
TtFAP57D  AAQLPQPTLNIOVSAGNNNONPOPEIKLENGNLISNLPADIVEKNFVAHLWMOCE-----SYLVFVESGEI ILCDSRGNF
TtFAP57B  KATLKNHCTQLNGAPOELS-----ODYTCHTWL TCD-----NNLIVCTANGEI IVCNENAEF
TtFAP57A  -----PNYLSYCILODG-----YMVIGTDMGEILLFQPSCEF
Dm        -----MAFLSLDLLMIG-----TSDDQLILVENGEQKLAQKASDA
  
```

406

```

TtFAP57C  OHIORVLEDRDER-----IPIDCITPFSKGLIVGCEAGNFAVWMKA
Hs        WETSIMVKEPTNGSKSLDVIQEESESLIEFPVSSPLPSYEQMVAASSHSQMSMPOVFAIAA YSKGFAC SAGPGRVLLFEKM
Xt        WEINIGSKSGOTDHEKHSAYSQELQVTSAEHAAPAP-----VRINAILAYSKGFLCSAGPGKVCMEFKV
Dr        WEINVTSVOKTES ESKQOYSDEPFSAL-----POVTAIVSY SNGFACSMGOGTVCLFEKT
Che       SVFNTDNG-----LAAASIVCYSKGFVVGQDNGVVTIFEK-
Tc        YPLPMPSPSDG-----VSINTLIAYSKGFCIGDGLGIYIFERT
TtFAP57D  LQIMEQSPRYFIVSRSGM-----IKIVA AVAYSKGFYVACSESI VLOYHYT
TtFAP57B  IEVLKQSPVFINKQS-----WRIECINTYSKGFIVGAKDSSIYVYRAT
TtFAP57A  KTI LASSPKNEQ-----FAIQCIQPYSKGFLVGGKECTILFYEKD
Dm        DTVLDMIDQEVFDRDKELQEQRF LPTQAVSLPD-----RRVLCMTAF PKGFAYIIFNRAFVFERVS
  
```

487

TtFAP57C EDPDL PYS GAQGKEKNOLIDOLHYLK-EWS--DKKASGVSGMDISSN-EELLVIAFKNNOIATLDLTQVIOQVPQNIKALK  
 Hs EEKDF-----YRESREIRIPVDPOS--NDPSOSDKQDVLCLCFSPS-EETLVASTSKNQLYSITMSLTEISKG-----  
 Xt EDKDF-----YKRSRDIRIPODEYS--TDPTQSEQQEIVCMCLSPS-EEMVLISTNKGQLYSIALSSAEISKG-----  
 Dr EKADL-----YKKTRVIKIPPKRFS--NDLSLTEKQKISTLCISPS-EETLVASTDLGQLYSIHLISIAELOKG-----  
 Che DEKEF-----YRKARSFTIENN-----PSRVRYLAVSPN-EEHLICSLENNOMYSLLLSNSEIMKA-----  
 Tc DNKEM-----YRKVRTFKFMNDAENMGPPSELIPVILSLALSPPPA-EEYVSFMTSTKQLYSINLPNADFFKS-----  
 TtFAP57D QDNDK-----NPFTCVNQFKLKO-----FVELKEIEIKSICMKA-EDKLLIGLDNNOIYIEIKIKPYHPETV-----  
 TtFAP57B NDDKN-----RYEEVNRVLFKOYS-----DLKDLVYVTGLSITPHSEDKSIACSLSNNQIYSIKLKRDSIYSS-----  
 TtFAP57A VDLKN-----PYKLCSSKIKOFRDMK-----AMITSLLLTPN-EEKLIVGVDSGQLLOVPFTSDSMQLN-----  
 Dm KFKFE-----RKTILTVP-----TNLYAEHMYQILNLAIDHK-QETVIVITTSHCQIYVGILIVPETLKT-----

568

TtFAP57C RDHNQRDRRDVQFDYLYKGFHNGPISSIDVCIORPLLVTCCSQDNSIIWNYASYKCELARKFPVSLNNDENRQVLLSVA  
 Hs -----EPAHFEYLMPPLHSAPITGLATCIRKPLIATCS-LDRSIRLWNYETINTLELFKEYQEE-----AYSIS  
 Xt -----EDAYFEYLTESWHSSSITGLSICVRKPLIATCS-LDRSVRIWNFENNTLELYKEYQEE-----AYSVA  
 Dr -----ECAYFEYLSHSFHNNIITGLSTCIRKPLIATSS-LDRSVRIWNFETNVLELYKEYQEE-----AYSVA  
 Che -----DEMNFVLTGNNHOGPIITGMDICIRKPLIATVS-TDKSVRLWNYVDRTCELTCKFFADE-----IYSVA  
 Tc -----DERVFEPIGOPFHS GAVIAVDVSVORPHAVTAG-RDRCIFLWNLITGVVEFRKRFS SD-----IHSIA  
 TtFAP57D ---NNDSS EDREVTLINHLNHTGPINSMDICKRKP IATCS-TDKTIKIWDYEKKQIKISWAFNEE-----AFCLS  
 TtFAP57B -----DSDEQIEQVSLAFHSGP INGMDCIRKPLIATCG-KDKTIKVMWNYEEKTLELSWLFNEE-----AYCIA  
 TtFAP57A -----EENSKCEPLFMPFHS DKITGLDVCIRKSLVATCS-VDKTVRIWNYSDNOLENSKEFEE-----AYAVA  
 Dm -----KOLKFEPLGVLIIHTGEI IAMSVC AWKPIIMTAS-RDQTI RIWNYETALVELVRKFQVD-----VNIVE

649

TtFAP57C FHPTGYLLAAGFFDKLRMYHVLND-----KLRTYREIS-VKNCTIIRFSNGGQYIAAGSPI SKFNKGANMGGAGTSTNSQ  
 Hs LHPSGHFIVVGFADKLRMLNLLID-----DIRSFKEYS-VRGCGECFSFNGGHLFAAVNG-----  
 Xt LHPSGLYVLVGFSDKLRFMNLLID-----DIRSVKEFT-VRGCKECAF SHGGHLFAAVNG-----  
 Dr LHPTGLYILVGFADKLRMLTLLMD-----DIKIFKEFT-IRNCRECTFSHGGHLFAAVNG-----  
 Che IHPNGLQILVGFADKLRMLTVLME-----ELKS IKELG-IKGCRECCFSTGGEYFAAVNG-----  
 Tc MHPSGLHLLVGLTDGLRMMNLFHN-----DVREFKNIG-IRSCMECRFSTGGOFFAAHA-----  
 TtFAP57D LHPOGFCVAVGFLDKLRMLNLCIHNSQNTTKNKAYKEISPFGKCKEIKFSNGGQYFAAVNSTSSN-----  
 TtFAP57B LHPSGLHMIVCLNDKLRWMNICLHQSNSNKSKHYKEITQFKQCKEVRF SNGGHYFAAIDGTQSS-----  
 TtFAP57A FHPSGFHII VAFTEKIRLMNIFEN-----DLISFKELS-VKNCREI OFSNGGHFFAITNV-----  
 Dm LSLTGMAAIGFS DQLRITQIFMD-----DLNIVKTYN-FPHCNAVRYSNFGHMMAAAYD-----

730

TtFAP57C FQNSNALQTGKKS VNYVINIYNAYTLENIT--CLKGHTGAVTDLIWTG-GDKKLYSCGEDGQIYVYTTDSWE--KDKIKL  
 Hs -----NVIHVYTTTSLLENIS--SLKGHTGKIRSIVWNA-DDSKLISGGTDGAVYEWNLSTGK--RETECV  
 Xt -----NVIHICYTATFENIT--NLKGHNKVRSAVWSS-DDSKLVSCGLDGAVYEWNILLGK--RESECV  
 Dr -----NVINIYSTITFEEIL--NLKGHNEKVOAVAFSL-NDSCLVSCGMDGAVYEWNTLSGT--RESECI  
 Che -----TTISIYNTYTCENVG--NLRGHNGKVRSLFWS-DDSR IISAGMDGAVYEWRLKDFK--REKENV  
 Tc -----TTIHVYTYTCELLG--HLRGHS GKVTIFFVPPDDTRLVSVGLDGAVHEFNLCDFH--KVNDNV  
 TtFAP57D -----HVIQVFKFFTGENPSQLVFKGHTGRVKCIAWSS-DDSFLVSCGLDGMILAWKLDQDFQ--HQOTIV  
 TtFAP57B -----QLIKVRFYTGEPQPSLVFKGHTGRVKS LAWSK-DDSLLASCVDGMVYIWRIDNDSGDLRLYENS  
 TtFAP57A -----SMVOVFQFYTGENPSNLVFRG-SGKVRTIFWEE-DDOGFYTGSTGLVIYWRVDDNGPQ--KTOIAQ  
 Dm -----NNIAITSVYKLDVLI--NLKGHNGIVLSVAWSR-TDKFLISGGAE GAIYLWDIETGA--RLQEIF

811

TtFAP57C KTPNVKLSML--YNEPQGI L MVIGPDDV NKG GYIQT VRFRRDR-----DEICD  
 Hs LKSCSYNCVTV-----SPDAKIIFAVGSDHTLKEIADSL-----ILREI  
 Xt LKSCSYSSVAM-----SSDSKTIFAVGSDOTLKEISDSQ-----IMREI  
 Dr LKTCSTYGVAI-----SPDAKTFFAVGTDCSLKEIHNSQ-----ILKEM  
 Che LKGCNYSVLA-----IPDCKTYAAGSDKKIKEFEEAPGAG-----TQITKEI  
 Tc LKAMTYNCGVA-----DVG--TVWTAGNDOKLROFDRTK-----LOPVAEY  
 TtFAP57D PRIVDIHNKGVNFSGLTLTVDNKTI VAVGNDRHIHQAVINEQQ-----PVDKTDK  
 TtFAP57B HKSIQLSCVALN-----MDTQMIYSCGSDRFLHQGFIFD-----SSQARK  
 TtFAP57A FNNLIITSITGL-----YNPDTTTOGLERILFVSGVSSSOENEGEKCVYKLVISCRQDKEGREITDNTLKKIYVSOPEOK  
 Dm OKGTEYVTIISC-----TNDPLTIYAGTSIGTIREFQDST-----LVREITI

892

TtFAP57C TQIKNYHISSTFNKCIYNTGLIAGTSTG--QIRVYPSLFAOOPFDSIP-----THNGOVSHIIASKDGRF  
 Hs SAFDVTYTAIVISHSGRMMF-VGTSVGTIRA-----MKYPLPLOKEFNEYQ-----AHAGPITKMLLTFDDQF  
 Xt PFDVYTTAVAVSHSGRMIF-TGTS LGTIRS-----MKYPLPLOKEFNEYQ-----AHAKPVTRLVVTFFDDQY  
 Dr SSRDVVCTTVALSRSGRIIF-IGTSTGLRV-----IKYPLMIQNDWIEYO-----AHAGPITKMVITFDDQF  
 Che DAGTNLTQVGLMPNAKVMFA--ATESGALRT-----YKFPLT--GEFOEIK-----SHSSITRLRMTWDEQL  
 Tc DLONASLYSMVISPKLKLLI--GGAGDGTVRV-----FNTYLGKLSGMERERGNNGGEIMIESHNAHS GIVTRLALTFDESL  
 TtFAP57D KLLDINLSCLAFFSSNKLLF--AGIQDDARSSGAI RCFIYPLTH-GKFTDYO-----AHDERGVEKMKITNDDRY  
 TtFAP57B INQEVQLNQIAFTSTNKIMF--AGIADQRSSGAVRCILFTTPTNNKFYDYP-----AHDEQIEKLRITYDDKY  
 TtFAP57A IFTGTNVSQIAISHSKLFF--FATEDRPGAIRITKYPTFN--EIMEIQ-----SHF--GPITRMRISFKDNY  
 Dm PSRTKGSVSDVCLARSDLIM--FVADHEGNLNFMLPFL EAGGGTFTNFR-----FFDGPVNKLRFSYDGLT

973

TtFAP57C LFTGGKDGSVFIFKVSSELNAEGHSIKADONDTAIAVDEK LADVVLVERQEIFDVYLGEOKKLKEEYENLENKMEIQALEEKN  
Hs LLTAAEDGCLFTWKVFDKDRGKIK-RERE-----VGFAEEVLVTKTDMEEKAOVMLELKT RVEELKMENEQRLRLKDM  
Xt LLSVSEEDGCLILWKISDKEGRGLK-RDKE-----VGAAEVLITKSDLEEKNOVMLELKT RVEELKMENEQRLRLKDM  
Dr LITVSEEDGCLFIWKIIDKEGQGLK-REKE-----LIYSEEILTNKLD FDEKSKMLLELNKAVEELOEDNKCQLSLKDT  
Che LVTASDDGCIFVYDVKDKDAKAAARRDQER-----MDWAVEVLVTRSELDEKKS RMSELEQOVAELTMQTEYQLRLKDL  
Tc VVSVGEDGAVIFWDVVPYRGPHE-----VEYSREIFMANS DLEESTKTVSALAEVNELKORMQQOOIKRDR  
TtFAP57D IITAGKDGCMVFEIKDKDARGMKLKDGYA-----KYSEELIITRDLDD LKSTRDGLIVQINEF SNQNAMIGLNSRD  
TtFAP57B LITAGRDCIMLFEIKDKDARGMRLKEGYB-----KNAEEILVTRD LDDDKNTIDNYOSLIGEFNNQTLNNTQNKD  
TtFAP57A IFTAGEDGALIIYENKEKEYQVKIENESVE-----AAEEFLIPRD QYNDQKREIEKLRQLNEERMKQEQOIKKMK  
Dm LFAISNKGTLAIWAMDNI EGKVPYMDQDLM-----RSQEVLI PRSQLNDKIEQIANLELR LKQAAEEFQYQLSQNEI

1054

TtFAP57C KMEREIKEMETKMRTEIKSYEORYEDLKFOKNRNEKEHGGLLKELEKTHLKAIEELENLYEKKLAFENEKFLOOQEQELIEE  
Hs NYSEKIKELTDKFIQEMESLTKNOVLRTEKEKQDVYHHEHIEDLLDKOSRELQDMECCNNO KLLLEYEKYQELQLKSORM  
Xt NYNEKIKELTEKFIQEMEVLTQNOILKTDSEKQDIKHQEDVAELLEKQSREIQDLETSNSQ KLLLEYEKYQELQLKSORM  
Dr EYNKKINELSEKCMQOIIISLNAEKEVLKKEKDNQOEAHNKAISDILERHDKELHDMES SNNQKMLMEYKYQELQLKLVN  
Che HLOERVKELTDKFTAELADROKPELLLOEKNEQEMEYEEKL LAEERSQVOLSTLDTQYQAKIMAEVERFOOLTQEKELL  
Tc VHEEOLLKMEQYADEOARRLAQYEAALKADKNEOAIQFTDFMAEMEAKKEALKRTKEDYSVKIOSLRDRADRLROLIDEI  
TtFAP57D DRIROLETOIENNSQKRKQMFQQLKSKTMEEOKLQIEINEIKEQFEQEQI QVMDTKYQKEVMSLVVEEYENQKRLHEIENNK  
TtFAP57B EQIKQLQERLQKSLLEHNKTAYEQLEKRRDIEKKYDEELKIMKEKFEAEIQ ELDTSYQRKVMDEVEKHE SVKKVHEIQRNK  
TtFAP57A DRDDKINOLENOOKDSMDRDLNKYOLLERENEMIESYEEKRMMKLOH ENNKRTIENEYKKAIALEMSRNEELAREKEKE  
Dm FDGQQLQEVHRSYCSALEELKELNNEI EARHTEEMNHITFQINSIREEHR IQDLTLATQYSERMLIEYQKFTNLRENMLEL

1135

TtFAP57C RMKFEKKLKEIERKHDDNINSLKYEFNDNFQAKQVYDSTKOTADDLRKIYEERLAQQEEEHEQEIRDLNENHKKIEITKLV  
Hs QEEYEKQLRDNDETKSOALEELTEFYEAKLQEKTTLLLEEAQEDVRQOLREFEETKKQIEEDEDREIQDIKTKYEKKLRDEK  
Xt QEEYEKOLHELEESKIOALEETTEHYEAKLOEKMSVLQLTODESROHLREFEETKKQIEEDGDREIQDMKIRYERRLREEK  
Dr QOYEYQOLHSMESKTOALEDMQSYEAKMEEKMILVNQYODESQORFKFEFEHIREEDTDAEIHDIRMKYEQNLREEK  
Che NERWDEONSLIVE SHERVIAELTEDYEAKLAEEESLQIEQLQEKAELEREFEETIKRQLEEDADREIEELKEKYESKLATER  
Tc QHEODAHLAEVREAAA KRAEDNERORKVLKELEENHQLLMEDEDTKRTENYCALIEDETDVEVTLKEDVEKRRKEOE  
TtFAP57D NNNKKTKLLOEHSQKLOIIDDQYQKLLLEEQITOKERV---EKQINHLQEKQOEVLMQISEEKETEIKNLNQNKSKDEQAIT  
TtFAP57B NNRERQOKAMQCOMAQSLDQEQYQK LHEERSORERV---QNDIDKMOKDNDEIYRQIEQETKEEIEENLNKNLEHEAEVK  
TtFAP57A EKR--FOSEIOOYOEHLROMEEKRRHYEEOLAIEK---OLYNDLHLKREELAYKFDOKRNLMEAAEELIDOLKEENES  
Dm RESYEDKLNKSTGTLQDITVEALENNYKQQLNERKELIRDLMKEMQDKKAEFIEYCREVELENDRN MVSTQTEYENKLTTER

1216

TtFAP57C KDLALAEFEKKNKFDDEDNKKAKENITRLDKKIEDQDN-----EIQYQKSRLTDASNOIEALKKDIISLEDLVKKKEKKIHE  
Hs ESNLRLKGETGIMRKKFSSLQKEIEERTNDIETLKG-----EQMKLQGVIKSLEKDIQGLKREIQERDETIQDKEKRIYD  
Xt ESSLRLKGESGIMRKKFSSLQKEIEERAADIEKMK-----EOKLQGVIKSLEKDI LGLKREIQERDETIQDKEKRIYD  
Dr KAHSKLKVLDLTKRFRHDLQREIENGLEIEK LKQ-----EVORLQAVIKSLENDITGLKTAIQNRDGI IQDKEKNIFO  
Che ESSLRKLGENGIMRKKFNALQKDIEAQKEEIKNLFE-----QKRELYATIASLEKD IASLKREIRERDETIQDKERRIYD  
Tc EEVATLOTNNDLLLSRENIKAELEAVKADVREKLR-----QOOSTLESOIEAAKRDIGALTOEFKDRGETIAEKERVLD  
TtFAP57D DQGLKAKSDISITKIMQQQQEAQDLKEQKQEYER-----QKEKLIKIONQELRDKIDGOKKIILERDR TIGEKEKIIYN  
TtFAP57B ERHKKAKSDAAITTKKIDQKKKDS EYQYEEQFRLHQK-----QLKKLREENETLLKEIQQQKEI IQERDKTIGKQEKQIYK  
TtFAP57A KMOVLFKNLEKAEIKKMDRRNDYDTEAOKLEEOKSKL KGTMEDITSIQETNKMLOKEKESHAK EIDERKTIRDKGRRIYD  
Dm NETQMWRGKAGVLQKKFESQSREIDNLLLEEVEILKE-----EHHKSQNIQKQMRNI EDLQKDIADR DYAINGKEKRIQD

1297

TtFAP57C YKYKINDLQKSKHVLSFRRTTEMRKSLPEKKEQIEKQKEQLCKLESEFEGLLVSEARNDKMKMQSQIENLNKNLKLOTEL  
Hs LKKKNQELGKFKFVLDYKIKELKKQIEPRENEIRVMKEQIQEMEAELENFHKQNTQLELNI TELWQKLRATDQEMRRERQK  
Xt LKKKNQELEKFKFVLDYKIKELKKQIEPRENEIKEMKEQIQEMES ELERFHKQNSQLDLNIAELKQK LKATDREMHKERQK  
Dr LKKKNQELNKTLEVMEFRAEYMQEQIEPKENEIQQQKDMQVCEFMKPHFAHH-----  
Che LKKKNQELEKFKFVLDYKIKELKKQIEPREQ EISDMKEQIKEMDGELERYHKTNSGLD LLI SNLKLKQEG LQOEVMTORTG  
Tc LKKKNQELEKFKFVLEYYKIKELKLOIDPRDEEIROAKSRLSEMGKEADNYTHSNEHLVLOIRNLRHKKAGOOKELDKLAEI  
TtFAP57D LKKKAQDLEKFKFVLDH KIKELKRDIVPREDEITKMKQETNNMDQYLKELNAYNNYLGTVVDELYTTQETMKEDIKQORQO  
TtFAP57B OKKKSONLEKFKFVLDH KIKELKRDIGPREDEIARMKEETNQMDQLLKKYNSYNNHLGN AVDELYTAQELMNSEIKNORTV  
TtFAP57A LKKKTQELEKFKFVLDYKIKELKRDIGPKEE IAKMKEQIANMNSEILHFKRTNANLKLIVTDLRLRQEGMKKEIEDOSKV  
Dm LLHKNOELDKYQVLGHKIAELKAQIEPREFQINDKRKH IIEMAEAELEGLNQNNVQLELQ LKEMRDKYLSNVAELRTERHR

1378

TtFAP57C TKOKENILNKIIMEIHD SVTYKQDPK-FLAQEMOKLYOTYVLKT----EHKOKO-YDNKGVOEMGROIQH LNKTIQOISES  
Hs ERDLEALVKRFKTDLHNCVAYIQEP-RLLKEKVRGLFEKYVQRADMVEIAGLNT----DLQQEYTRQREHLERNLATLKKK  
Xt VRDIEAVVKRFKTDLHNCVGF IQEP-KMLKDNIRELYSKYVQSDVAEIVGVDA----DIQREYARQREHLERSLSTLQKK  
Dr -----  
Che KSDAEQLLKRMOHDLQAIIPYFOEP-KDLKEQVKALYHKYCGNOPLRTEEDADL-----EREAARQREYLEKTVDTLKRK  
Tc MRGFAEYLSRLWTELSCLREETNP--RKLKECAKMLFDKYTSTRKAVAANKTLASRTAADEVREYNRRDHLERNLAGLKNK  
TtFAP57D ISVQOVKISRFKDDVYSLAQHILDYD-KLVDETERLFMKHVNDKEVKROSVEGD-----IMMEYRSOKKNLEKLVNMFKKS  
TtFAP57B ISSTNNKIKRFKDDLYKAVQHIQDYE-KLQOHVNELEKRLYANKNIERNKNDQI-----LOEYENQKAHLQYKVRLLKKY  
TtFAP57A IQONNOYIKAFEQDMSDCHOHIADYK-KLKQKVLNLYNOYVQGDSSKKKRLENN----DOOKEIMKERAHLET SVNNLKI K  
Dm AKASRECLHSICS DIYYVAGEINSAE-ALKKAVKELFRKHASDDELKRFVTLDA----EVRDEFMRQRKQIENVLDRYKSV

1459

TtFAP57C SNKLLDRRYQDIFNKTKENAELIYDLNDRKONKEFOSQIILNLRMKEDKYIKEIANLKTEIQKLLKGGPGGSSKKNNMMO  
Hs VVKEGELHRTDYVRIMOENVSLIKEINELRRELKFTRSOVYDLEAALKLTKKVRPQEVSETEPSR-DMLSTAPTARLNEQE  
Xt LAKDTEIHRITDNVRVMQENVTLIKEINDLRRELKLSRTKVHDLLEAILGLNKKTRKNNATELKVSSSEGLHPVGVLRRLNSEE  
Dr -----  
Che LAKDSELHRTDNLRIQENTALIKEINELRREIRTLKSRVAGINGAVNLSVTGRRPGSPGDSLMLSEGLKRELEMORDLIT  
Tc VNKDAENNRSDKNRITTEENVILIREINDLRKEARRLAEKAGAWRKTEKCAASLQOQEEFKRELAMQRAELKRLRALARKLAE  
TtFAP57D LQKDNQIHKDDKIRIMKDNVDLIREINTLRKSIKDITKGOOSNIPDQKGOTOHMPLOTQPSRKSISQVLPPIPKSAMFE  
TtFAP57B LKQDNQIHKDYNLGLMSNNVNLIKEINILRKOIKDIQKGGGTGKPAEHARSLTTSFKRARTAGVRSNSKNGNRPDEIDE  
TtFAP57A HDKNQSVHKSDDTIIMKHNTFLIFEINHLKREKKKILEDKAKMLMQATQKKKQDGTSRVDIDSLEKEIQKNEDEKRKLKED  
Dm AEDKSVQKKYD--KLFKENVILIEEIEKLNENKMLRSKVKEDLRRSTKTIHK-----

1540

TtFAP57C LPPAQQMQQQYDEQRONVNSVOOTORNFFSOSQGOVQSNQRPOSQMKIGOKGTICRGKNFDTKTLAIFDKAKMMDMTAEM  
Hs ETGRIIEMORLEIQRLRDOIQEQEQTGFHTLAGVRLPSSLNSQVLDLEVKTN-----  
Xt ETDRIIDMQRLEIKRLRDLIQSQELTQGVRRPPSVGRIPALTMTTDRGIREFPWDR-----  
Dr -----  
Che RLREETAAKEARIROLESMIAPRPTSRERLPPMEGFPGSMPPERISSSLMKGESRPPSAAILPPGIMEQEAVA-----  
Tc EAREKGITLTLPSLTEGRPGS-----  
TtFAP57D GVTQONEIQKSHTOINPELVEEKQKVLNSLOTDILELOKVYEALNYEKHNLTA-----  
TtFAP57B ALNDPAIQKQKQILVMQSDITQLRVQLEELHEENRALTVSNNF-----  
TtFAP57A IEKLRQYNDQIKNQLRQOIQNQDDDEDN-----  
Dm -----

1621

TtFAP57C ELNTOKLLQQEVLIKSIIRRKIHKHVIDRACNDIAFEELMALQAQEQGGFIPLOQQDIDTSDDNIIYQAEQRQYSRK  
Hs -----  
Xt -----  
Dr -----  
Che -----  
Tc -----  
TtFAP57D -----  
TtFAP57B -----  
TtFAP57A -----  
Dm -----
